1 Article

# 2 A New High-throughput Screening (HiTS) Method 3 for Phages – Enabling Crude Isolation and Fast 4 Identification of Diverse Phages with Therapeutic 5 Potential

6 Nikoline S. Olsen<sup>1</sup>, Niels Bohse Hendriksen<sup>1</sup>, Lars H. Hansen<sup>2, ‡,\*</sup> and Witold Kot<sup>2, ‡,\*</sup>

7 <sup>1</sup> Department of Environmental Science, Aarhus University, Frederiksborgvej 399, Roskilde, Denmark;  
8 [niso@envs.au.dk](mailto:niso@envs.au.dk)

9 <sup>2</sup> Department of Plant and Environmental Sciences, University of Copenhagen, Thorvaldsensvej 40, 1871  
10 Frederiksberg C, Denmark; [lhha@plen.ku.dk](mailto:lhha@plen.ku.dk), [wk@plen.ku.dk](mailto:wk@plen.ku.dk)

11 ‡ W. K. and L. H. H. initiated and supervised the project equally.

12 \* Correspondence: [lhha@plen.ku.dk](mailto:lhha@plen.ku.dk) Phone: +45 28 75 20 53, [wk@plen.ku.dk](mailto:wk@plen.ku.dk) Phone: +45 35 33 38 77

13 Received: date; Accepted: date; Published: date

14 **Abstract:** Bacteriophage therapy and application of phages as biocontrol in plant production and  
15 food processing, all necessitates acquisition of suitable phages. Depending on purpose, the selection  
16 criteria of phage characteristics include lifestyle (lytic/lysogenic), host range, physical stability and  
17 absence of unwanted genetic traits such as integrases, antibiotic resistance or bacterial virulence  
18 factors. The exclusivity of antibiotic resistant clinical infections and possible development of phage-  
19 resistance instigates a need to continually build sizeable phage libraries and also be able to rapidly  
20 isolate and characterise novel phages of specified bacterial hosts. Current methods for phage  
21 isolation are both laborious and time consuming, suitable only for the isolation of a limited number  
22 of phages. Thus, we developed the *High-Throughput Screening* (HiTS) method for phages for fast  
23 isolation and identification of potentially hundreds of distinct phages against single hosts. This  
24 scalable method enables screening of hundreds of samples, in multiple simultaneous setups with  
25 varying parameters increasing the likelihood of isolating multiple distinct phages specific for the  
26 given conditions. The efficiency of the method is emphasised by our screening of 200 environmental  
27 samples, resulting in the identification of an abundance of unique phage species lytic to *Escherichia*  
28 *coli*, *Salmonella Enterica*, *Enterococcus faecalis* and *Pseudomonas aeruginosa*.

29 **Keywords:** bacteriophage; phage isolation; phage therapy; high-throughput; wastewater; *Escherichia*  
30 *coli*, *Salmonella Enterica*, *Enterococcus faecalis*; *Pseudomonas aeruginosa*.

31

---

## 32 1. Introduction

33 The upsurge of antibiotic resistant bacteria is one of the main health concerns of our time [1].  
34 Pathogenic bacterial infections are becoming ever more difficult to treat, and even last resort  
35 antibiotics such as the glycopeptide antibiotics vancomycin and teicoplanin are falling short as  
36 efficient antimicrobial agents [2]. Bacteria are consecutively acquiring antibiotic resistance and  
37 develop multidrug resistance [3], which necessitates the development of alternative antimicrobials  
38 or means to increase the efficiency of existing antibiotics. Phage therapy (PT) is the therapeutic use  
39 of the viral antagonists of bacteria, the bacteriophages (phages), to treat bacterial infections in humans  
40 or animals. Most bacteriophages have narrow host-ranges, limiting their infectivity to specific species  
41 or even strains. Consequently, PT does not instigate drastic perturbations of natural microbiota like  
42 traditional antibiotic treatments [4]. Though studies have been limited, PT has not been shown to  
43 have any adverse side effects [5]. Moreover, PT has shown potential as a last resort treatment of multi-

44 resistant bacterial infections, when traditional antibiotics fall short [6]–[8]. Hence, PT is, especially  
45 when applied as a combination therapy together with conventional antimicrobials, foreseen to play  
46 an essential role in the multifaceted strategy required to combat the lurking antibiotic crisis [1], [9].  
47 Furthermore, the use of phages for biocontrol in plant production and food processing has displayed  
48 a promising potential [10], and could be a sustainable alternative to traditional chemicals facing  
49 restrictions due to concerns for public health and the spread of resistance [11].

50 Yet, a successful biocontrol or PT venture requires phages with different modes of action, and  
51 lots of them. Infection-specific phages and prepared phage cocktails are rarely generalisable [12].  
52 Clinical infections can be unparalleled and call for *de novo* isolation or genetic engineering, as was the  
53 recent case with a 15-year old patient with cystic fibrosis caused by *Mycobacterium abscessus* [6]. More  
54 than 10 000 phages infecting *Mycobacterium smegmatis* were screened in addition to 100 environmental  
55 samples, resulting in only three suitable phages, two of them requiring genetic engineering [6].  
56 Indeed, one of the greater hurdles for effective PT, is the availability of suitable phages [12].  
57 Methodologies for isolation of phages have not changed much since phages were discovered more  
58 than 100 years ago. The procedures are laborious and time-consuming. In general, phages are isolated  
59 by either direct plating or by enrichment and then subsequent purification. Enrichment entails an  
60 introduction of a host to a phage-containing sample, which is afterwards removed by centrifugation  
61 and filtration when phages have been amplified. Direct plating and purification is typically  
62 performed with the soft-agar overlay technique, first described by A. Gratia in 1936 [13].  
63 Improvements to increase throughputs have been proposed, such as tube-free agar overlays [14], and  
64 phage activity can now be measured by means more suitable for automation, like colorimetric  
65 methods [15]. However, no truly high-throughput isolation method has, to our knowledge been  
66 offered. A citizen science approach, like the great effort performed by The Science Education Alliance  
67 Phage Hunters Advancing Genomics and Evolutionary Science (SEA-PHAGES) has resulted in the  
68 isolation of thousands of phages against *M. smegmatis* [16]. But this type of approach requires both  
69 substantial funding and facilities.

70 In order to establish and expand libraries of phages relevant for PT and biocontrol, affordable,  
71 fast and efficient screening methods are needed to enable rapid isolation and identification of  
72 candidate phages. Large libraries of phages infecting the same single host, also enables important  
73 phage-host interaction studies, expanding our understanding of phage taxonomy and ecology. Here  
74 we present the *High-Throughput Screening* (HiTS) method for phages, which enables a single person  
75 to go from a high number of samples to a plethora of identified phages within weeks. The simplicity  
76 of the method enables >500 samples to be handled simultaneously. The HiTS method selects for  
77 predominantly lytic and easily culturable phages. The resolution is a single or a few phages from  
78 each sample processed. The integrated sequencing of the identified phages allows for an early  
79 assessment of genomes enabling the selection of candidates which do not possess any unwanted  
80 genetic-traits and are thus suitable for further characterisation and potential application as PT or  
81 biocontrol agents.

## 82 2. Materials and Methods

83 The method presented is host-system independent and can thus be applied for screening of  
84 environmental samples for phages virulent to any culturable fast-growing aerobic or facultative  
85 anaerobic bacteria by adjusting host media, incubation temperature and time. The protocol enables a  
86 simple and fast (4 consecutive days), yet crude purification of single or a low number of distinctive  
87 phages from a small sample volume (0.5-1.5 ml). The method allows for a high number of samples to  
88 be handled, with simultaneous investigation of diverse sample matrices or parallel screenings of the  
89 same sample-set with varying parameters e.g. host, pH, media, amendments and incubation  
90 conditions (Figure 1). This increases the likelihood of sequestering multiple distinctive phages from  
91 each sample. The method is suitable for both direct plaque sequencing (DPS) [17] and standard phage  
92 DNA extraction from lysate. The screening procedure entails four steps: 1. *Phage amplification*, 2.  
93 *Liquid purification*, 3. *Spot-test* and 4. *Phage collection and DPS or optional: plating of dilution series*.

94

95 2.1. Protocol

96 **High-throughput Screening (HiTS) Method for Phages**

97 The method, which is scalable for robotics, requires a centrifuge suitable for 96-well plates and  
98 a 96-pin replicator or a one  $\mu\text{l}$  multichannel pipette. Multichannel pipettes or a pipetting robot may  
99 ease many of the steps involved. Dry samples should be suspended prior to processing and  
100 preferably centrifuged and filtered. The maximum number of samples per plate is 94. The sample  
101 volume can be adjusted as desired and as applicable to available well plates. By increasing the volume  
102 of raw sample input, the number of phages per incubation is also increased and thus the chance of  
103 isolating these. Initial sample volume only affects step 1. *Phage amplification*. Volumes and  
104 concentrations suggested in step 0. and step 1. are suitable for screening 1.5 ml raw sample in deep-  
105 well plates with a working volume (wV) of 2.2 ml (e.g. 732-0612, VWR, Radnor PA US). All  
106 incubations should be performed under optimal host conditions (media and temperature) and hence  
107 adjusted as required. In step 4 there is the option to either collect the phages and sequence them by  
108 DPS or to do titers and aim for single plaques, and then do DPS or sequence phage-amplifications.  
109

110 **0. Preparation**

- 111 a. Prepare all media, solutions and agar-plates.  
112 b. Inoculate host cells in  $2 \times 10$  ml liquid media and incubate overnight  
113 c. (ON).

114  
115 **1. Phage amplification (day 1)**

- 116 a. Distribute a maximum of 94 samples, in suitable volumes (1.5 ml) in  
117 a deep-well plate (#1) with pierceable sealing tape (e.g. Z722529-  
118 50EA, Excel Scientific, Victorville CA US). Sterilised water (1.5 ml) is  
119 added as negative amplification-controls to wells D6 and E6. To each  
120 of the 96 wells add:

121 90  $\mu\text{l}$   $\text{CaCl}_2$  (0.25 M) and  $\text{MgCl}_2$  (0.25 M), final conc. 10 mM

122 110  $\mu\text{l}$  ON host culture, final conc. 5% V/V

123 500  $\mu\text{l}$  Host media (conc.  $\times 4.4$ ), final conc.  $\times 1$

124 During addition of media, carefully pipette up and down a few times  
125 to mix. Close the well-plate and incubate ON on a shaker (200 rpm).

- 126 b. Inoculate ON host culture in 10 ml liquid media for next day.  
127

128 **2. Liquid purification (day 2)**

- 129 a. Filter to remove host bacteria by transferring 200  $\mu\text{l}$  (punch through  
130 pierceable tape) from each well to a 96-well filter Plate (0.45  $\mu\text{m}$ ) (e.g.  
131 MSHAS4510, Merck Millipore, Burlington MA US), pipette up and  
132 down a few times before extracting. Centrifuge filter plate on top of  
133 a new well-plate (#2, wV 200  $\mu\text{l}$  e.g. 269787, Nunc, Roskilde, DK) at  
134  $900 \times g$  for 2 minutes. Then add pierceable sealing tape to well-plate  
135 #2. Discard the filter plate.

- 136 b. Prepare a third well-plate (#3, wV 200  $\mu\text{l}$ ) with pierceable sealing  
137 tape and add:

138 180  $\mu\text{l}$  host media (conc.  $\times 1$ )

139 10  $\mu\text{l}$  of host culture, final conc. 5% V/V

140 10  $\mu\text{l}$  0.2 M  $\text{CaCl}_2$  and 0.2 M  $\text{MgCl}_2$ , final conc. 10 mM

141 Use the 96-pin replicator to transfer  $\sim 1$   $\mu\text{l}$  of each lysate (punch  
142 through pierceable tape) in well-plate #2 to each well in well-plate  
143 #3. Close well-plate #3 and incubate ON on a shaker (200 rpm). If  
144 processing more than one set of samples, clean the 96-pin replicator  
145 by ethanol and flame three times in between and make sure to cool  
146 it down before re-use.

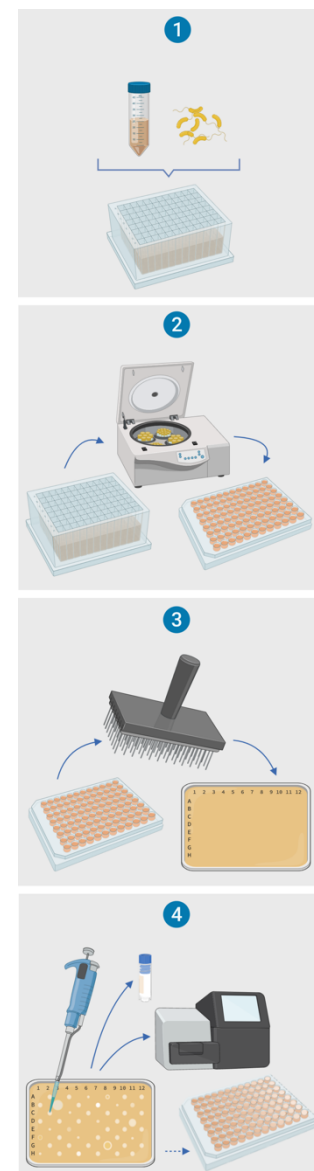

**Figure 1** The four steps in the HiTS method. Illustration created with BioRender.

147 c. Inoculate ON host culture in 10 ml liquid media for next day.

148

### 149 3. Spot-test (day 3)

150 a. Filter to remove host bacteria as described in step 2a.

151 b. Prepare two large (Ø 14 cm e.g. 82.1184.500, Sarstedt, Nürnberg DE or at least 12 x 8 cm e.g.  
152 242811, Nunc) soft-agar overlay plates (A and B) of 0.5% agarose amended with:

153 CaCl<sub>2</sub> and MgCl<sub>2</sub> (final conc. 10 mM)

154 Host culture (final conc. 2.5 - 5 %)

155 c. While the plates solidify remove every second row of pipette-tips in a box of 200 µl pipette-tips  
156 to facilitate the transfer of lysate from every second well in a chequered pattern into two new  
157 microtiter plates with pierceable sealing tape, number #4 (A) and #5 (B) (Figure S1).

158 d. Use the 96-pin replicator to carefully transfer ~1 µl of lysates from well-plate A (#5) to the soft-  
159 agar overlay plate A. Make sure to specify direction on the plate. The chequered pattern ensures  
160 a safe distance between spotted samples, a negative amplification-control (D6 or E6) on each  
161 plate and sterilisation-controls (every second tip) (Figure 1). Clean the 96-pin replicator by  
162 ethanol and flame and repeat the procedure with well-plate B (#5) and soft-agar overlay plate B.  
163 Incubate soft-agar overlay plates upside down ON. Seal well-plates A (#4) and B (#5) and store  
164 at 4°C.

165 e. **Optional:** Inoculate ON host culture in 10 ml liquid media for titre estimation next day.

166

### 167 4. Phage collection and DPS, or optional: plate dilution series (day 4)

168 a. The centre of clearing zones (agar-plate A and B) is collected for DPS. Additional clearing zone  
169 is dissolved in 100 µl SM-buffer [18], filtered (0.22 - 0.45 µm) and stored for future purification  
170 and characterization. If clearing zones are too small for double collection make amplifications of  
171 the phage-SM solutions (inoculate host bacteria in 10 ml media, after ~1 h add lysate, next day  
172 centrifuge and filtrate) and extract DNA for sequencing from these.

173 b. Optional: titre the lysates by transferring phage solutions from positive (plaque-forming) wells  
174 to new wells in column 1 of as many new well-plates (#6+, wV 200 µl) as required. Eight-fold  
175 dilutions series are made within the well-plates by adding 180 µl SM-buffer to all wells in column  
176 2-9 and then transferring 20 µl of the solution in column 1 to column 2 pipetting up and down  
177 to mix and repeating the procedure for the remaining columns. Spot (~1 µl) the dilution series  
178 on soft-agar overlay plates with a 96-pin replicator or multichannel pipette and incubate ON.  
179 Next day: Count plaques or clearing zones for approximate titre. Do DPS of single plaques if  
180 present and also collect clearing zone for phage storage. If single plaques are not present plate  
181 lysate dilution giving rise to 10-50 plaques on a full plate by the soft-agar overlay method (add  
182 the lysate to 4 ml 0.5% agarose with 10 mM CaCl<sub>2</sub> and MgCl<sub>2</sub> and 2.5-5% (V/V) ON host culture,  
183 pour on standard petri dish with agar). Next day, pick diverting plaque morphologies for DPS  
184 or phage-amplification, lysate hereof can be used for DNA extraction and phage storage.

### 185 2.2. Phage screenings

186 Five screenings were performed as described in 2.1 Protocol, using *Escherichia coli*, *Salmonella*  
187 *enterica*, *Enterococcus faecalis* or *Pseudomonas aeruginosa* as hosts (Table 1). For the *E. coli*, *E. faecalis* and  
188 *S. enterica* screenings 188 distinct wastewater samples divided into two sets of 94 samples were used,  
189 for the *P. aeruginosa* screening 82 wastewater samples were used together with eight soil samples and  
190 four organic waste samples (Table S1). The *S. enterica* screenings were performed with both a small  
191 sample volume (SV) of 0.5 ml and a large sample volume (LV) of 1.5 ml, while the *E. coli* and *E. faecalis*  
192 screenings were only performed with 0.5 ml (SV) and the *P. aeruginosa* screening only with 1.5 ml  
193 (LV). The SV screenings (*E. coli*, *E. faecalis* and *S. enterica*) followed the protocol, with the exception  
194 that instead of DPS, lysates from step 3. corresponding to positive wells (those instigating clearing  
195 zones) were used for DNA extraction and sequencing, while phages were stored by collecting top-  
196 agar of clearing zones or plaques. In step 4 of the LV screenings (*S. enterica* and *P. aeruginosa*) lysates  
197 from positive wells were tittered in the 96-well format and the most diluted lysates instigating single

198 plaques or clearing zones were used for making 10 ml amplification lysates for DNA extraction,  
199 library preparation, sequencing and phage storage. All incubations were performed at 37°C.

#### 200 2.2.1. Bacteria and growth media

201 The host bacteria used for phage screenings were *E. coli* (K-12, MG1655), *S. enterica subsp. enterica*  
202 serovar Enteritidis PT1, the vancomycin-resistant *E. faecalis* (strain ATCC 700802 / V583) and the  
203 chloramphenicol-resistant *P. aeruginosa* (PAO1). The media applied was LB (Alpha Biosciences,  
204 Baltimore MD US).

#### 205 2.2.2. Samples

206 The 188 inlet wastewater samples (40-50 ml) were collected in time-series of 2-4 days during July  
207 and August 2017, from 48 Danish wastewater treatment facilities geographically distributed in both  
208 rural and urban areas on Zealand, Funen and in Jutland. Upon receipt, the samples were centrifuged  
209 (9000 × g, 4 °C, 10 min), the supernatant filtered (0.45 µm) and then stored in aliquots at -20°C. The  
210 organic waste samples were collected from four different Danish facilities in February, May and  
211 November 2017. The 12 soil samples (~5 g) were collected in Roskilde municipality, Denmark, in  
212 March 2019. Prior to screening the soil was suspended in 5 ml LB and slowly and continuously  
213 inverted for 1h at room temperature, then the samples were centrifuged (9000 × g, 5 min) and the  
214 supernatant filtrated (0.45 µm). Refer to Table S1 for a list of all samples and facilities.

#### 215 2.2.3. DNA extraction, library preparation and sequencing

216 Phage DNA extractions were performed by an initial DNase treatment, 1 U of DNase 1 (New  
217 England Biolabs, Ipswich, MA US) per ~100 µl lysate (37°C, 30 min, inactivated by 10 µl 50 mM  
218 EDTA), followed by addition of 3 U Proteinase K (A & A Biotechnology, Gdynia, Poland) and 10%  
219 (v/v) SDS solution (55°C, 30 min, inactivated by 70°C, 10 min). The extracted DNA was then purified  
220 in the well-plate format using the ZR-96 Clean and Concentrator kit (Zymo research, Irvine, CA US),  
221 following manufacturer's instructions and eluting in 6 µl of the supplied elution buffer. Sequencing  
222 libraries were built according to manufacturer's instructions with minor modifications as described  
223 in Kot *et al.*, (2014) [17] using the Nextera® XT DNA kit (Illumina, San Diego, CA USA), the libraries  
224 were sequenced as paired-end reads on Illumina NextSeq platform with the Mid Output Kit v2 (300  
225 cycles).

#### 226 2.2.4. Assembly, annotation, identification and phylogenomic analysis

227 The obtained reads were trimmed and assembled in CLC Genomics Workbench 10.1.1. (CLC  
228 BIO, DK), overlapping reads were merged with the following settings: mismatch cost: 2, minimum  
229 score: 15, gap cost: 3 and maximum unaligned end mismatches: 0, and then assembled *de novo*.  
230 Additional assemblies were constructed using SPAdes 3.12.0 [19]. Gene prediction and annotation  
231 was performed using a customized RASTtk version 2.0 [20] workflow with GeneMark [21], with  
232 manual curation and verification using BLASTP [22], HHpred [23] and Pfam version 32.0 [24], or *de*  
233 *novovo* annotated using VIGA version 0.11.0 [25] based on DIAMOND searches (RefSeq Viral protein  
234 database) and HMMer searches (pVOG HMM database). NT similarity was determined as  
235 percentage query cover multiplied by percentage NT identity. Novel phages were categorised  
236 according to ICTV taxonomy. The criterion of 95% DNA sequence similarity for demarcation of  
237 species was applied to identify novel species representatives and to determine species uniqueness  
238 within the dataset. All unique phage genomes were deposited in GenBank (Table 1). All genomes  
239 were assessed for antibiotic resistance genes (ARGs) and bacterial virulence genes using ResFinder  
240 3.1 [26], [27] and VirulenceFinder 2.0 [28]. NT and amino acid (AA) similarities were calculated using  
241 tools recommended by the ICTV [29], i.e. BLAST [22] for identification of closest relatives (BLASTn  
242 when possible, discontinuous megaBLAST (word size 16) for larger genomes) and Gegenees version  
243 2.2.1 [30] for assessing phylogenetic distances of multiple genomes, for both NTs (BLASTn algorithm)  
244 and AAs (tBLASTx algorithm) a fragment size of 200 bp and step size 100 bp was applied.

245 Evolutionary analyses for phylogenetic trees were conducted in MEGA7 version 2.1 (default settings)  
 246 [31]. These were based on the large terminase subunit *terL*, a gene commonly applied for phylogenetic  
 247 analysis [32], [33] and on the DNA encapsidation gene *gpA* for the <13kb alleged *Podoviridae*. The NT  
 248 sequences were aligned by MUSCLE [34] and the evolutionary history inferred by the Maximum  
 249 Likelihood method based on the Tamura-Nei model [35]. The tree with the highest log likelihood is  
 250 shown manually curated by adding color-codes and identifiers in Inkscape version 0.92.2. The R  
 251 package iNEXT [36], [37] in R studio version 1.1.456 [38] was used for rarefaction analyses, species  
 252 diversity ( $q=0$ , datatype: incidence\_raw), extrapolation hereof (estimateD) and estimation of sample  
 253 coverage. Additional graphs were prepared in Excel version 16.31.

### 254 3. Results

#### 255 3.1. Screening efficiency and resolution

256 Across all five screening between 3% ( $n = 5$  of 188) and 81% ( $n = 153$  of 188) of samples yielded  
 257 clearing zones plausibly due to lysis by phages, the majority of these also gave rise to the  
 258 identification of phages (Table 1). However, in some cases the DNA extraction was unsatisfactory or  
 259 the sequencing failed. Between 61% (*E. coli* screening  $n = 94$  of 153) and 82% (*S. enterica* SV screening  
 260  $n = 42$  of 51) of clearing zones were successfully sequenced i.e. yielded reads assembling to phage  
 261 contigs with an average coverage  $> \times 20$  (Table 1). Regardless of host, a single phage was identified  
 262 from the vast majority of sequenced samples (64-100% per screening), although in some instances  
 263 two (0-29% per screening), three (0-6% per screening) or four (0-1% per screening) phages were  
 264 identified from a single sample (Figure 2a). The *Escherichia* phages were the most numerous (136  
 265 phages from 94 wells), they were more frequently (34 samples) isolated as more than one phage per  
 266 sample and the only ones to be four phages in a sample [39] (Figure 2a, Table 1). The number of  
 267 phages per sample did not differ considerably between phages of *S. enterica* (123 phages from 102  
 268 wells) and *P. aeruginosa* (43 phages from 38 wastewater wells), while only four phages lytic to *E.*  
 269 *faecalis* were identified in four separate samples (Figure 2a). *Escherichia* phages were identified in  
 270 samples from 43 different facilities out of the 48, *Enterococcus* phages in samples from 4 facilities and  
 271 *Salmonella* phages in samples from 22 of the 48 facilities included in these screenings. In the *P.*  
 272 *aeruginosa* phage screening, phages were identified in wastewater samples from 95% of the 21  
 273 facilities included, (20 out of 21). Furthermore, *P. aeruginosa* phages were identified in three of the  
 274 four organic waste samples, but in none of the 8 soil samples (Figure 2c).

275 **Table 1.** Number of samples screened, clearing zones detected and phages identified in the five HiTS screenings,  
 276 using *S. enterica*, *E. coli*, *E. faecalis* or *P. aeruginosa* as host. *Escherichia* phage data from Olsen *et al.*, (2020) [39].

| Host                 | Sample (ml) | Samples (n)     | Clearing zones (n) | Sequenced lysates <sup>1</sup> (n) | Phages (n) | Unique species <sup>2</sup> (n) | Novel species <sup>3</sup> (n) |
|----------------------|-------------|-----------------|--------------------|------------------------------------|------------|---------------------------------|--------------------------------|
| <i>S. enterica</i>   | 0.5 SV      | 188             | 51                 | 42                                 | 47         | 33                              | 28                             |
| <i>S. enterica</i>   | 1.5 LV      | 188             | 74                 | 60                                 | 76         | 45 (26 <sup>4</sup> )           | 38 (24 <sup>4</sup> )          |
| <i>E. coli</i>       | 0.5 SV      | 188             | 153                | 94                                 | 136        | 104                             | 91                             |
| <i>E. faecalis</i>   | 0.5 SV      | 188             | 5                  | 4                                  | 4          | 4                               | 3                              |
| <i>P. aeruginosa</i> | 1.5 LV      | 94 <sup>5</sup> | 48                 | 38                                 | 46         | 22                              | 8                              |

277 <sup>1</sup>Includes all lysates for which sequencing yielded reads assembling to contigs with a coverage  $> \times 20$ . <sup>2</sup>Phages  
 278 with  $\leq 95$  % nucleotide similarity to the other phages in this dataset. <sup>3</sup>Phages with  $\leq 95$  % similarity to the other  
 279 phages in this dataset and those deposited in the NCBI database. <sup>4</sup>Excluding the phages with  $>95$  % nucleotide  
 280 similarity to phages in the *S. enterica* SV screening. <sup>5</sup>82 wastewater samples, 8 soil samples and 4 organic waste  
 281 samples.

282 Of the 136 *Escherichia* phages, the majority (76%) represent unique species [39]. The many  
 283 *Salmonella* and *P. aeruginosa* phages are more homogeneous. The two *S. enterica* phage screenings  
 284 identified 123 phages. Out of 47 SV phages 14 were shown to have  $>95$ % NT similarity with other SV  
 285 phages, while 31 of the 76 LV phages were shown to have  $>95$ % NT similarity with other LV phages

286 and an additional 19 of the LV phages had >95% NT similarity with SV phages. Hence, a total of 59  
 287 (48%) *Salmonella* phages of distinct species are identified. Similarly, of the 46 *P. aeruginosa* phages 22  
 288 (48%) are unique, while all four *E. faecalis* phages represent distinctive species (Table 1).

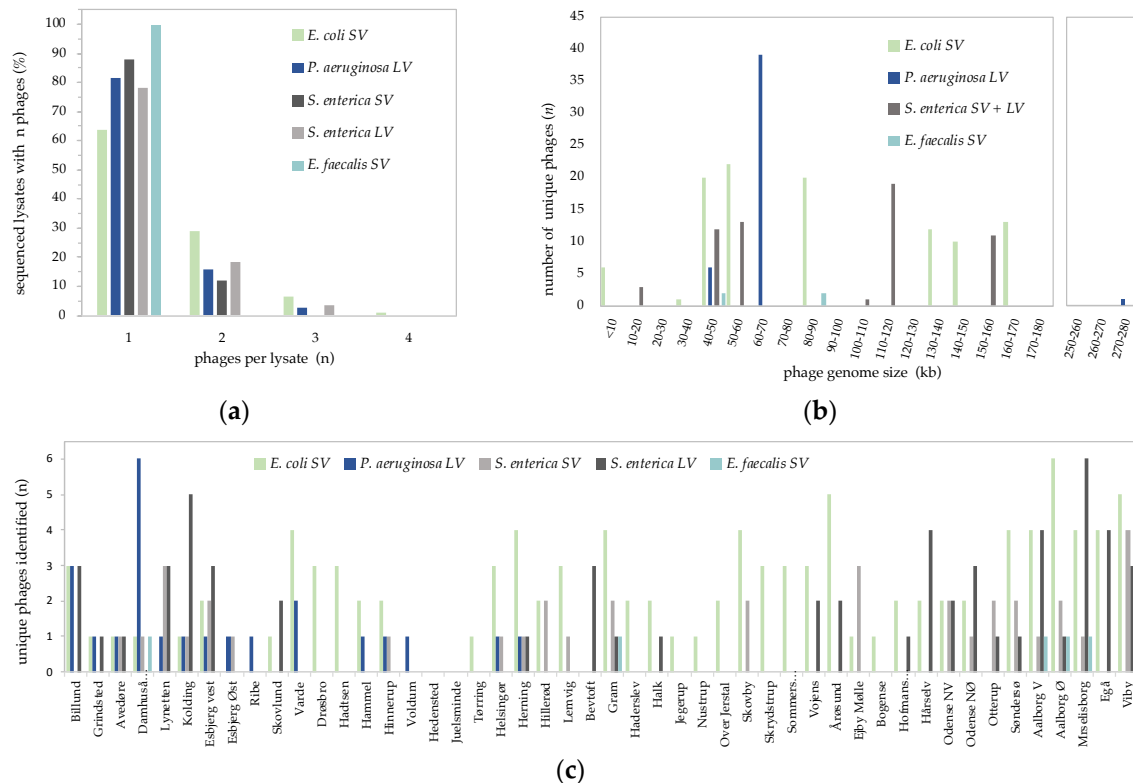

289 **Figure 2** (a) Number of phages per lysate (n) (x-axis) as occurring in percentage of all sequenced lysates (y-axis),  
 290 presented according to individual screenings. (b). Average genome size (kb) of Gegenees based clusters, of  
 291 unique phage species (<95% nucleotide similarity to other phages in the dataset) organized by host, from all  
 292 screenings. (c) Distribution of all 309 phages identified organised per facility, only the first 21 facilities were  
 293 included in the *Pseudomonas aeruginosa* screening.

### 294 3.2. Novelty and diversity of HiTS-phages identified compared to NCBI

295 The phages identified cover an impressive wide range of genome sizes (Figure 2b, 4), GC  
 296 contents and predicted morphologies, representing five different families; the *Ackermannviridae*,  
 297 *Myoviridae*, *Podoviridae* and *Siphoviridae* of the order *Caudovirales* and also the non-tailed *Microviridae*  
 298 (Table 2) [39]. The *Escherichia* phages are indeed remarkably numerous and diverse and are  
 299 consequently described separately in Olsen *et al.* (2020) [39]. In summary, disregarding the jumbo  
 300 phage *Pseudomonas* phage fnug (278.9 kb), the *Escherichia* phages cover the largest size range (5.3-  
 301 170.8 kb) and have an impressive GC content span (35.3-60.0%) [39]. Members of the new family  
 302 *Ackermannviridae*, were only detected among the *Salmonella* phages, just as members of the  
 303 *Microviridae*, a family of small single stranded DNA phages, were only observed among the  
 304 *Escherichia* phages [39]. The *Salmonella* and *P. aeruginosa* phages covered similar GC content spans of  
 305 36.9-56.5% and 39.0-59.5%, respectively. The *Salmonella* phage genomes vary in sizes from 11.6 kb  
 306 (*Salmonella* phage astrithr) to 159.1 kb (*Salmonella* phage maane), while the non-jumbo *P. aeruginosa*  
 307 phages are more uniform having genome sizes of 44.9 kb (*Pseudomonas* phage clash) to 66.5 kb  
 308 (*Pseudomonas* phage shane). The *Enterococcus* phages have genomes of 39.7-85.7 kb, *Enterococcus*  
 309 phage heks and nately, respectively (Figure 2b, Tables S2-S4).

311 An impressive number (n = 154) of novel phage species have so far been identified with the HiTS  
 312 method. No less than 67% (n = 91) of the *Escherichia* phages [39], 42% (n = 52) of the *Salmonella* phages,  
 313 22% (n = 8) of the *P. aeruginosa* phages and three out of four *Enterococcus* phages represent novel phage  
 314 species (Table 1, Figure 3). Whereas most of the *Escherichia* (69%) and all of the *P. aeruginosa* phage

315 species representatives have a high NT similarity (>89%) with their closest relatives, a larger  
 316 proportion of the *Salmonella* phages differ more from their closest relatives as only 54% (n = 42) of the  
 317 unique *Salmonella* phages species have >89% NT similarity to their closest relative (Figure 3). Two of  
 318 the *Escherichia* phages and three *Salmonella* phages share <50% NT similarity with published phages.  
 319 Likewise, two of the *Enterococcus* phages (Figure S3, Table S3) and *Salmonella* phage Akira (63% NT  
 320 similarity) are only distantly related to any published phage (62-65% NT similarity) (Figure 3). The  
 321 189 unique phages (<95% NT similarity with other phages in the dataset) and their GenBank accession  
 322 numbers are listed in supplementary materials (Table S2-S5).

323 **Table 2** Predicted morphology of all the phages identified in screenings for *Escherichia*,  
 324 *Salmonella*, *P. aeruginosa* and *Enterococcus* phages, based on taxonomy of closest relative.  
 325 *Escherichia* phage data from Olsen *et al.*, (2020) [39].

| Phage taxonomy                        | Isolation hosts: | <i>E. coli</i> | <i>S. enterica</i> | <i>P. aeruginosa</i> | <i>E. faecalis</i> |
|---------------------------------------|------------------|----------------|--------------------|----------------------|--------------------|
| <i>Caudovirales; Ackermannviridae</i> |                  | -              | 21                 | -                    | -                  |
| <i>Caudovirales; Myoviridae</i>       |                  | 79             | 18                 | 39                   | -                  |
| <i>Caudovirales; Siphoviridae</i>     |                  | 34             | 76                 | 1                    | 4                  |
| <i>Caudovirales; Podoviridae</i>      |                  | 10             | 8                  | 6                    | -                  |
| <i>Microviridae; Bullavirinae</i>     |                  | 8              | -                  | -                    | -                  |
| Unclassified bacterial viruses        |                  | 5              | -                  | -                    | -                  |

326 No virulence factors or ARGs were detected in any of the 189 unique phages. Furthermore, no  
 327 integrases were identified and though putative recombinases do occur it is uncertain if they are  
 328 involved in DNA repair or integration.  
 329

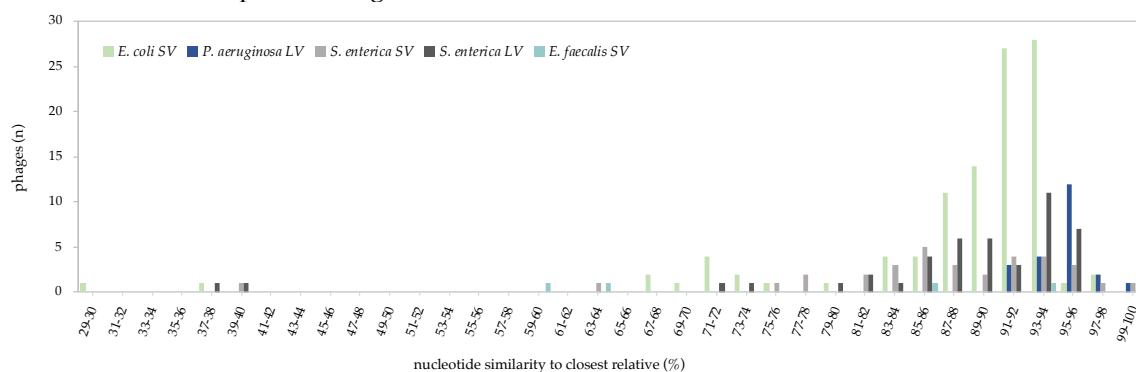

330 **Figure 3** Distribution of nucleotide similarity (%) to closest relative (Blast) of all phages from all  
 331 five screenings.  
 332

### 333 3.3 *P. aeruginosa* and *Enterococcus* phages from Danish wastewater

334 The *P. aeruginosa* phages group into two distinct clusters and two singletons (Figure S2). The  
 335 vast majority (n = 38) of the *P. aeruginosa* phages are closely related (90.9-98.5% NT similarity) to  
 336 phages of the genus *Pbunavirus* of the family *Myoviridae*, with genome sizes of 60.7-66.8 kb (89-95  
 337 CDSs, 54.8-55.7% GC, no tRNAs). A smaller group of six *P. aeruginosa* phages (44.9-45.3 kb, 68-69  
 338 CDSs, 52.1-52.5% GC, 3-4 tRNAs) are closely related (94.1-96.3% NT similarity) to phages of the genus  
 339 *Bruynoghevirus* of the family *Podoviridae*. The jumbophage frug is closely related (93% NT similarity)  
 340 to phages of the genus *Phikvirus*, family *Myoviridae*. While the last *Pseudomonas* phage Iggy (60.7 kb,  
 341 90 CDSs, 56.5% GC, no tRNAs) is closely related (94.6%) to the unclassified *Siphoviridae* *Pseudomonas*  
 342 phage PBPA162 (MK816297), none of them share >8% NT similarity with any other published phages.

343 The *Enterococcus* phages are all predicted to have *Siphoviridae* morphology, but divide into two  
 344 distinct clusters with NT inter-Genes scores of 0 (Figure S3). Phages heks and Nonaheksakonda  
 345 (39.7-41.9 kb, 64-74 CDSs, 34.6-35.0% GC, no tRNAs) are related to equatroviruses, but with only



346 59% NT similarity. The other two (85.3-85.7 kb, 131-134 CDSs, 30.2-30.3% GC, 1 tRNA) are more  
347 closely related (87-96% NT similarity) to unclassified *Siphoviridae* (Figure 2b, Tables S2-S5).

### 348 3.4 *Salmonella* phages from Danish wastewater

349 Based on NT similarity with closest relatives, 59 distinctive species of *Salmonella* phages were  
350 identified, of which 52 represent novel species. Estimations based on both the SV and LV screenings  
351 predicts species richness of easily culturable phages lytic to *S. enterica subsp. enterica* serovar  
352 Enteritidis PT1 in Danish wastewater to be nearby 80 (Figure S4), while Shannon diversity estimates  
353 68 and 61 and Simpson diversity 51 and 38, for the SV and LV screenings, respectively (Figure S4).  
354 The estimates are however expected to be subject to large prediction bias due to the relatively small  
355 reference sample size, and a 95% confidence interval suggests a range for all diversity indices of 26-  
356 173. Sample completeness is estimated to be achieved at ~1300 samples for a SV screening and at ~800  
357 samples for a LV screening (Figure S4). The HiTS *Salmonella* phages belong to at least four different  
358 families, *Ackermannviridae*, *Myoviridae*, *Podoviridae* and *Siphoviridae*, covering a wide range of genome  
359 sizes and GC contents (Table S5). They group into five clusters and three singletons (inter-Gegenees  
360 scores = 0) corresponding to their proposed taxonomy, excluding phage Akira (Figure 4). In spite of  
361 a NT similarity of 63% and a Gegenees score of 38-39 with its closest relative the unclassified *roufivirus*  
362 *Salmonella* virus KFS\_SE2 (MK112901) Akira does not group with neither KFS\_SE2 or the type  
363 species of *roufivirus* *Aeromonas* phage pIS4-A (NC\_042037) in the phylogenetic tree, resulting in a  
364 peculiar pattern in the Gegenees analysis (Figure 4). Furthermore, Akira shares limited NT similarity  
365 (39%) with pIS4-A and a Gegenees score of only 3-4 (Figure 4, Table 2).

366  
367 All nine novel phages (143-159 kb, 187-209 CDSs, 44-45% GC, 3-4 tRNAs) of the *Ackermannviridae* are  
368 related (78-99% NT similarity) to phages of the genus *Kuttervirus*, subfamily *Covovirinae*, defined by an  
369 average genome size of 158.1 kb, with an average GC content of 44.5% and averagely coding for 201  
370 proteins and 4.3 tRNAs. These nine phages have an average NT intra-Gegenees score of just 60, but  
371 are more similar to one another and also to the type species of *Kuttervirus*, *Escherichia* virus CBA120  
372 (JN593240) when comparing AAs (Gegenees score = 88-97).

373 Most of the *Salmonella* phages are predicted to belong to *Siphoviridae* (n = 76, 32 species, 29 novel  
374 species). Twenty of the unique *Siphoviridae* phages (105-115 kb, 151-171 CDSs, 39.3-40.1 GC, 23-31  
375 tRNAs) are related (71-95% NT similarity) to phages of the genus *Tequintavirus*, the T5 like phages.  
376 However, whereas phage oldekolle has low NT Gegenees scores with the rest (n = 27-32) and is closely  
377 related to T5 (93% NT similarity), the remainder appear more distantly related to T5. Even though,  
378 these phages cluster together, they have relatively low NT inter-Gegenees scores (n = 59-90) and they  
379 also differ from published phage genomes by 6-29% NT similarity (Figure 4, S5, Table S5). An  
380 additional ten unique *Siphoviridae* phages (41-44 kb, 56-70 CDSs, 50% GC, 0-1 tRNA) were found to  
381 be closely related to jerseyviruses, subfamily *Guernseyvirinae*. This genus is defined by genome sizes  
382 of 40-44 kb, comparable morphology and a shared DNA identity of  $\geq 60\%$  and  $>68\%$  protein content  
383 [40]. The wastewater jerseyviruses-like phages are a heterogeneous group with varying NT intra-  
384 Gegenees scores of 38-91, yet the AA intra-Gegenees scores are all  $>69$ . However, the Gegenees NT  
385 scores between the novel phages and the type species *Salmonella* phage Jersey (NC\_021777) are all  
386  $<33$  though the AA scores are 65-71. The novel jerseyviruses-like phages are relatively abundant in  
387 the Danish wastewater samples and most of them were identified in several samples from different  
388 treatment facilities. Phages with  $>95\%$  NT similarity with phage wast were found eight times in  
389 samples from five distinct facilities and phages with  $>95\%$  NT similarity with phage demigod as  
390 many as 12 times, in samples from six different facilities (Table S5).

391  
392 The last *Siphoviridae* within the *Salmonella* phages is the novel phage slyngel, related (92% NT  
393 similarity) to *Escherichia* phage vB\_EcoS\_G29-2 (MK373798) an unclassified *Hanriverovirus*, subfamily  
394 *Tunavirinae*. Furthermore, slyngel has 88% NT similarity with the type species *Shigella* phage pSf-1  
395 (NC\_021331), with which a more distant relationship is also suggested by the phylogenetic analysis  
396 (Figure 4, S6).

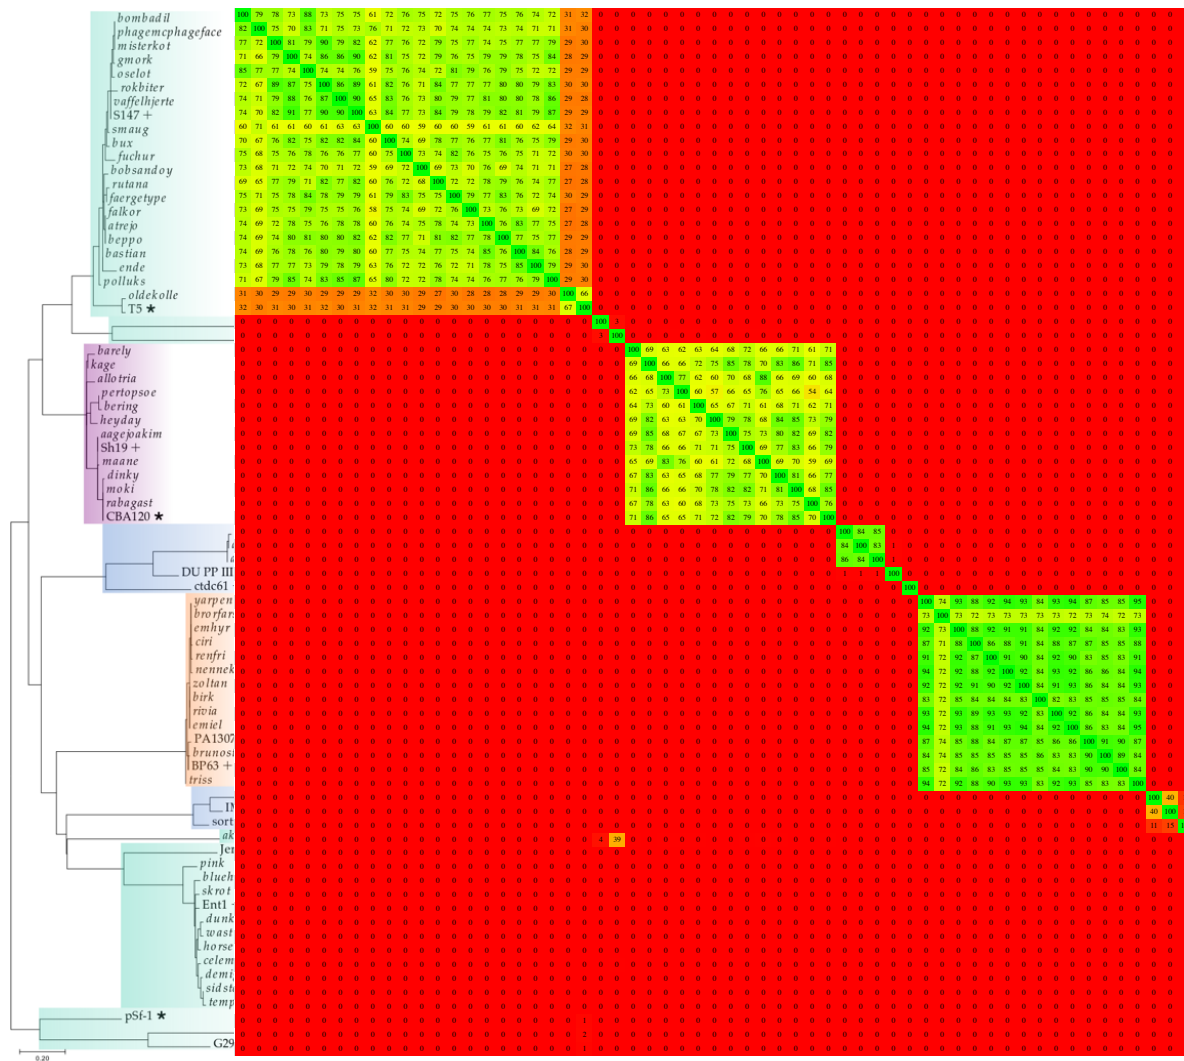

397 **Figure 4** Phylogenetic tree (Maximum log Likelihood: -4176.67, based on large terminase subunit or for the <13 kb  
 398 *Podoviridae* the DNA encapsidation protein, scalebar: substitutions per site) and phylogenomic nucleotide distances  
 399 (Gegenees, BLASTn: fragment size: 200, step size: 100, threshold: 0%). Predicted morphology is indicated by colorbars,  
 400 ■ *Myoviridae*, ■ *Siphoviridae*, ■ *Podoviridae*, ■ *Ackermannviridae*, novel phages from this study are in italics, while close  
 401 relatives are denoted by + and type species by \*

402 Twelve of the *Salmonella* phages are based on NT similarity of the *Myoviridae* and though their  
403 closest relatives are all unclassified *Myoviridae*, they constitute the most homogeneous group. They  
404 have comparable genomes (52-53 kb, 67-73 CDSs, 45.7-46% GC, no tRNAs) and cluster together in  
405 both the Gegenees analyses and in the phylogenetic tree. Though phage brorfarstad has slightly lower  
406 NT Gegenees scores (n = 72-74), than the rest, only a minor difference can be observed in the AA  
407 Gegenees analysis (Figure 4, S5, Table 3).

408  
409 The eight *Podoviridae* divide into a cluster of three phage species representatives (astrid, assan  
410 and astrithr) with comparable (83-84 NT Gegenees score) small low GC genomes (11.6-11.7 kb, 15  
411 CDSs, 39.7-39.8% GC, no tRNAs) and the singleton lumpael. Phages with >95% NT similarity with  
412 phage Lumpael were observed in five samples from five distinct facilitates. Lumpael (41.1 kb, 58  
413 CDSs, 59.9% GC, no tRNAs) has the highest GC content observed and shares only 76% NT similarity  
414 with its closest relative Enterobacteria phage IME\_EC2 (KF591601). Astrid, assan and astrithr all  
415 share <40% NT similarity with their closest relative Pectobacterium phage DU\_PP\_III (MF979562),  
416 and though they share NT Gegenees scores of only 0-1 and AA of 45, they do form a monophyletic  
417 clade (Figure 4, S5).

#### 418 4. Discussion

419 When it comes to phage isolation three aspects are key; titre, sterility and purity. These features are  
420 a prerequisite for any phage work, regardless of aim. However, purity and sterility are not the main  
421 focus in a screening such as the HiTS method. This method does not intend to provide a final PT or  
422 biocontrol product, but instead offers crude isolation of highly diverse phages in sufficient titres. This  
423 is to provide a fast and crude acquisition of numerous and diverse phages and thereby a basis for  
424 further phage isolation and establishment or expansion of phage libraries. If a phage of interest is in  
425 a mixed lysate, sequencing enables primer design for PCR verification when isolating the  
426 individually plaquing phages.

427 The method is unique in its ability to identify numerous assorted phages while also facilitating  
428 crude isolation in a very short time span. This makes investigations of phage diversity easy and  
429 possible. The capacity of the HiTS method to uncover diverse phages is clearly illustrated by the  
430 impressive findings when screening for phages of PT relevance in wastewater, especially those  
431 infecting *E. coli* and *S. enterica*, as presented in Olsen *et al.* (2020) [39] and in this study, respectively.  
432 Even for less abundant phages diversity and novelty was uncovered, the *P. aeruginosa* phages  
433 represent three distinct families, and eight are novel phage species representatives, while all the  
434 *Enterococcus* phages are of the *Siphoviridae* two of them have limited NT similarity (<60%) with  
435 published phages. The reported five screenings yielded no less than 331 potential hits in the form of  
436 clearing zones resulting in the identification of 154 novel phage species. Furthermore, none of these  
437 phages code for known virulence factors or ARGs and none appear to be lysogenic, making them all  
438 potential candidates for PT and biocontrol applications.

439 Unlike metagenomic sequencing approaches, this method provides actual phages with a direct  
440 link to the pathogenic host or any host in interest. The HiTS method does not reveal the diversity of  
441 individual samples; hence many phages remain undetected, especially those which are not easily  
442 grown under laboratory conditions. The HiTS method is a competition-based method and clearly  
443 selects for lytic phages with traits preferable in PT and biocontrol applications i.e. a high burst size  
444 and a short latency period. Consequently, the HiTS method enables the capture of the most prevalent  
445 phage(s) of the day in any sample. Thus, when screening numerous distinct samples, it provides an  
446 estimate of species richness of this type of phages in the given sample matrix. Accordingly, the species  
447 richness of easily culturable phages, presumably with high burst-sizes and short latency times, lytic  
448 to the specific strains of *Escherichia* and *Salmonella* phages in Danish wastewater was estimated to be  
449 at least in the range of 160-420 and 49-173, respectively (Figure S4) [39]. This is likely an  
450 underestimation considering the relatively small sample sizes and the inherent bias in the method to  
451 only isolate a single or a few phages per sample combined with the many plaque-forming lysates for  
452 which DNA-extraction or sequencing was unsuccessful. If the aim of screening is to isolate phages

453 with PT or biocontrol potential or phages that are easy to study under laboratory-conditions, the  
454 targeting of lytic and highly reproductive phages is indeed an advantage. However, if the aim is to  
455 disclose true diversity or detect more difficult to culture specimen, other methods such as plaquing  
456 without amplification may be superior. Metagenomic sequencing approaches are constantly refined  
457 and now offers high detection levels of phageomes [41], but phages of interest detected may be near  
458 impossible to isolate *in vitro*. The key advantage of the HiTS method is indeed that it offers both  
459 identification through sequencing and also provides physical isolates of all phages targeting the  
460 specific host-species used as bait. Consequently, interesting discoveries such as rare and novel phages  
461 or the presence of remarkable genes with unexpected or desired functions can be investigated  
462 following a final isolation. It should however be noted that it is not recommended to sequence the  
463 lysate giving rise to plaques or clearing zones, while harvesting phages from the plaques, as was done  
464 by the authors in the SV screenings. This approach may result in sequencing of phages in lysate not  
465 present in the harvested soft-agar.

466 A 96-well setup carries a risk of cross-contamination, however the use of pierceable sealing-tape  
467 as recommended in the HiTS method, reduces this risk. The presence of a negative amplification  
468 control in each spot-test (agar-plates A and B) provides an indication of potential cross-  
469 contamination. No plaquing was observed in negative amplification controls in any of the screenings.  
470 Furthermore, the chequered-pattern with empty wells between all lysates used when performing the  
471 spot-tests ensures that in the case of improper sterilisation, still no phages will be transferred to other  
472 wells in use during spotting with a 96-pin replicator, as opposite patterns are present in well-plate A  
473 and B. Finally, if the sterilisation of the 96-pin replicator is insufficient any contaminating phages will  
474 plaque in between purposely spotted phages. This was not observed in any of the screenings.

475 A high number of distinct samples, as required by the HiTS method, may be cumbersome to  
476 collect and prepare, but once they are collected, they can be aliquoted, stored (-20°C) and used for  
477 numerous screenings of different target bacteria, as only very small sample volumes (0.5-1.5 ml) are  
478 required. The small sample-volumes also permits for samples to be collected by sending out  
479 collection-kits and having them returned by mail or carrier, provided that the applicable law allows  
480 it. Any sample matrix with high quantities of the target host is applicable. Furthermore, the suitability  
481 of time-series of wastewater-samples eases the sample collection and makes the screening method  
482 more feasible as it limits the number of distinct sampling sites. In this study, no *Enterococcus*, only  
483 two *P. aeruginosa* (9%), five *Salmonella* (8.5%) and nine *Escherichia* phage species (8.6%) [39] were  
484 detected more than once in samples from the same facility in any distinct screening. Wastewater  
485 treatment plants receive inlet wastewater in a constant yet changing flow thus the presence of diverse  
486 phages can be expected to fluctuate and be interchangeable.

487 Sequencing is continuously getting cheaper [42], and even though this is the major expenditure  
488 of the HiTS method, it is economically feasible. Spending weeks and months on thoroughly isolating  
489 hundreds of phages is also a costly affair in regards of time and workhours. And still, also by  
490 individual isolation resulting phages may end up being similar specimen.

491 With the HiTS method phage libraries can be build and sequenced after just four consecutive  
492 days of sample processing. The fast turnaround is of particular importance when screening for  
493 phages for PT, but not all phages are suitable for PT. Lysogenic phages should be avoided as they do  
494 not necessarily lyse their hosts and may also increase virulence of their hosts by lysogenic conversion  
495 [43]. Some phages, also those with a lytic lifestyle, code for genes with unwanted genetic traits such  
496 as toxins, superantigens, intracellular survival/host cell attachments proteins or ARGs which can be  
497 spread to bacterial communities through transduction [44], [45]. This is especially relevant to consider  
498 when isolating phages from wastewater, as treatments plants can be considered hotspots for ARGs  
499 [45]. Fortunately, ARGs and other unwanted genetic traits can, for a large part, be deduced by genetic  
500 analyses and thus phages coding for them can with decent confidence be excluded. Hence, the HiTS  
501 method allows selection of new candidate phages after a few weeks of screening, sequencing and  
502 analysing. The ability of the candidate phages to infect the target host is already verified and the  
503 absence of undesired genetic traits confirmed, consequently the phages are now ready for  
504 experimental validation and final isolation, if required.

505 In conclusion, the HiTS method presented here has the potential to efficiently detect the diversity  
506 of and crudely isolate phages relevant for PT and biocontrol which are abundant in the sample matrix  
507 explored. The HiTS method is simple, fast and cost-efficient. It can prove to be a valuable, scalable  
508 method in the case of urgent needs for PT suitable phages targeting specific clinical infections. With  
509 the HiTS method establishment of sizeable discovery phage banks becomes fast and efficient. Such  
510 phage discovery banks could be lifesavers eliminating the need to spend time on isolating new PT  
511 phages and would also facilitate important phage taxonomy and ecology studies and can be explored  
512 for industrially-relevant biotechnological applications.

513 **Supplementary Materials:** The following are available online at [www.mdpi.com/xxx/s1](http://www.mdpi.com/xxx/s1), Figure S1: Illustration  
514 of Checker plating, Table S1: List of samples, Table S2: List of unique *P. aeruginosa* phages, Table S3: List of  
515 unique *Enterococcus* phages, Table S4: List of unique *Salmonella* phages, Figure  
516 S2: Phylogenomic nucleotide distances of the 39 unique *P. aeruginosa* phages, Figure S3:  
517 Phylogenomic nucleotide distances of the four unique *Enterococcus* phages, Figure S4: Rarefaction curves and  
518 diversity indices, Figure S6: Phylogenomic amino acid distances of the 59 unique *Salmonella* phages.

519 **Author Contributions:** Conceptualization, N. S. O., W. K.: and L. H. H.; methodology, N. S. O., W. K. and L. H.  
520 H.; validation, N. S. O., W. K., N. B. H. and L. H. H.; formal analysis, N. S. O.; investigation, N. S. O.; resources,  
521 N. S. O. and L. H. H.; data curation, N. S. O.; writing—original draft preparation, N. S. O.; writing—review and  
522 editing, N. S. O., W. K., N. B. H. and L. H. H.; visualization, N. S. O.; supervision, N. S. O., W. K. and L. H. H.;  
523 project administration, N. S. O., W. K. and L. H. H.; funding acquisition, W. K. and L. H. H.

524 **Funding:** This research was funded by Villum Experiment Grant 17595, Aarhus University Research Foundation  
525 AUFF Grant E-2015-FLS-7-28 to Witold Kot and Lars Hestbjerg Hansen's Human Frontier Science Program  
526 Grant: RGP0024/2018.

527 **Acknowledgments:** This study had not been possible without the much-appreciated contribution by the many  
528 collaborating members of the Danish Water and Wastewater Association (DANVA), who kindly supplied us  
529 with time-series of wastewater samples from their treatment facilities. A special thanks to the Billund and  
530 Grindsted treatment facilities of Billund Vand & Energi, Lynetten, Avedøre and Damhusåen treatment facilities  
531 of BIOFOS, Kolding treatment facility of BlueKolding, Esbjerg Øst, Esbjerg Vest, Ribe, Varde og Skovlund  
532 treatment facilities of DIN Forsyning, Drøbro, Hadsten, Hammel, Hinnerup and Voldum treatment facilities of  
533 Favrskov Forsyning, Haerning treatment facility of Herning Vand, Hillerød treatment facility of Hillerød  
534 Forsyning, Lemvig treatment facility of Lemvig Vand og Spildevand, Bevtoft, Gram, Haderslev, Halk, Jegerup,  
535 Nustrup, Over Jerstal, Skovby, Skrydstrup, Sommersted, Vojens and Årøsund treatment facilities of Provas,  
536 Marselisborg, Egå and Viby treatment facilities of Aarhus vand, Hedensted, Juelsminde and Tørring treatment  
537 facilities of Hedensted Spildevand, Ejby Mølle, Bogense, Hofmangave, Hårslev, Nordvest, Nordøst, Otterup  
538 and Søndersø treatment facilities of VandCenterSyd, Øst and Vest treatment facilities of Aalborg Forsyning and  
539 finally Helsingør treatment facility of Forsyning Helsingør.

540 **Conflicts of Interest:** The authors declare no conflict of interest. The funders had no role in the design of the  
541 study; in the collection, analyses, or interpretation of data; in the writing of the manuscript, or in the decision to  
542 publish the results.

## 543 References

- 544 [1] F. L. Gordillo Altamirano and J. J. Barr, "Phage Therapy in the Postantibiotic Era.," *Clin. Microbiol. Rev.*,  
545 vol. 32, no. 2, pp. e00066-18, Apr. 2019.
- 546 [2] J. Y. H. Lee *et al.*, "Global spread of three multidrug-resistant lineages of *Staphylococcus epidermidis*,"  
547 *Nat. Microbiol.*, vol. 3, no. 10, pp. 1175–1185, Oct. 2018.
- 548 [3] A.-P. Magiorakos *et al.*, "Multidrug-resistant, extensively drug-resistant and pandrug-resistant  
549 bacteria: an international expert proposal for interim standard definitions for acquired resistance,"  
550 *Clin. Microbiol. Infect.*, vol. 18, no. 3, pp. 268–281, Mar. 2012.
- 551 [4] D. M. Lin, B. Koskella, and H. C. Lin, "Phage therapy: An alternative to antibiotics in the age of multi-

- 552 drug resistance," *World J. Gastrointest. Pharmacol. Ther.*, vol. 8, no. 3, p. 162, 2017.
- 553 [5] K. M. Caflisch, G. A. Suh, and R. Patel, "Biological challenges of phage therapy and proposed  
554 solutions: a literature review," *Expert Rev. Anti. Infect. Ther.*, vol. 17, no. 12, pp. 1011–1041, Dec. 2019.
- 555 [6] R. M. Dedrick *et al.*, "Engineered bacteriophages for treatment of a patient with a disseminated drug  
556 resistant *Mycobacterium abscessus*," *Nat. Med.*, vol. 25, no. 5, p. 730, 2019.
- 557 [7] R. T. Schooley *et al.*, "Development and Use of Personalized Bacteriophage-Based Therapeutic  
558 Cocktails To Treat a Patient with a Disseminated Resistant *Acinetobacter baumannii* Infection,"  
559 *Antimicrob. Agents Chemother.*, vol. 61, no. 10, Oct. 2017.
- 560 [8] S. Aslam *et al.*, "Early clinical experience of bacteriophage therapy in 3 lung transplant recipients," *Am.*  
561 *J. Transplant.*, vol. 19, no. 9, pp. 2631–2639, Sep. 2019.
- 562 [9] A. B. Monk, C. D. Rees, P. Barrow, S. Hagens, and D. R. Harper, "Bacteriophage applications: Where  
563 are we now?," *Letters in Applied Microbiology*, vol. 51, no. 4, pp. 363–369, 2010.
- 564 [10] A. B. Carstens, A. M. Djurhuus, W. Kot, and L. H. Hansen, "A novel six-phage cocktail reduces  
565 *Pectobacterium atrosepticum* soft rot infection in potato tubers under simulated storage conditions,"  
566 *FEMS Microbiol. Lett.*, vol. 366, no. 9, May 2019.
- 567 [11] A. Svircev, D. Roach, and A. Castle, "Framing the future with bacteriophages in agriculture," *Viruses*,  
568 vol. 10, no. 5, MDPI AG, p. 218, 01-May-2018.
- 569 [12] H. Brüßow, "Hurdles for Phage Therapy to Become a Reality—An Editorial Comment," *Viruses*, vol.  
570 11, no. 6, p. 557, Jun. 2019.
- 571 [13] A. Gratia, "Des relations numeriques entre bacteries lysogenes et particules de bacteriophage," *Ann.*  
572 *Inst. Pasteur*, vol. 57, no. 1936, pp. 652–676, 1936.
- 573 [14] K. M. Kauffman and M. F. Polz, "Streamlining standard bacteriophage methods for higher  
574 throughput," *MethodsX*, vol. 5, pp. 159–172, Jan. 2018.
- 575 [15] M. Henry *et al.*, "Development of a high throughput assay for indirectly measuring phage growth  
576 using the OmniLog TM system," *Bacteriophage*, vol. 2, no. 3, pp. 159–167, Jul. 2012.
- 577 [16] G. F. Hatfull, "Mycobacteriophages: Windows into Tuberculosis," *PLoS Pathog.*, vol. 10, no. 3, p.  
578 e1003953, Mar. 2014.
- 579 [17] W. Kot, F. K. Vogensen, S. J. Sørensen, and L. H. Hansen, "DPS – A rapid method for genome  
580 sequencing of DNA-containing bacteriophages directly from a single plaque," *J. Virol. Methods*, vol.  
581 196, pp. 152–156, Feb. 2014.
- 582 [18] E. Wood, "Molecular Cloning. A Laboratory Manual," *Biochem. Educ.*, vol. 11, no. 2, p. 82, 2003.
- 583 [19] A. Bankevich *et al.*, "SPAdes: a new genome assembly algorithm and its applications to single-cell

- 584 sequencing,” *J. Comput. Biol.*, vol. 19, no. 5, pp. 455–77, 2012.
- 585 [20] T. Brettin *et al.*, “RASTtk: A modular and extensible implementation of the RAST algorithm for  
586 building custom annotation pipelines and annotating batches of genomes,” *Sci. Rep.*, vol. 5, no. 1, p.  
587 8365, Jul. 2015.
- 588 [21] J. Besemer and M. Borodovsky, “GeneMark: web software for gene finding in prokaryotes, eukaryotes  
589 and viruses,” *Nucleic Acids Res.*, vol. 33, no. Web Server, pp. W451–W454, Jul. 2005.
- 590 [22] S. F. Altschul, W. Gish, W. Miller, E. W. Myers, and D. J. Lipman, “Basic local alignment search tool,” *J.*  
591 *Mol. Biol.*, vol. 215, no. 3, pp. 403–410, Oct. 1990.
- 592 [23] J. Soding, A. Biegert, and A. N. Lupas, “The HHpred interactive server for protein homology detection  
593 and structure prediction,” *Nucleic Acids Res.*, vol. 33, no. Web Server, pp. W244–W248, Jul. 2005.
- 594 [24] R. D. Finn *et al.*, “The Pfam protein families database: towards a more sustainable future,” *Nucleic Acids*  
595 *Res.*, vol. 44, no. D1, pp. D279–D285, Jan. 2016.
- 596 [25] 6 Enrique González-Tortuero<sup>1</sup>, Thomas David Sean Sutton<sup>1</sup>, Vimalkumar Velayudhan<sup>1</sup>, 4 Andrey  
597 Nikolaevich Shkoporov<sup>1</sup>, Lorraine Anne Draper<sup>1</sup>, Stephen Robert Stockdale<sup>1, 2</sup>, Reynolds 5 Paul  
598 Ross<sup>1, 3</sup>, Colin Hill<sup>1, 3</sup>, “VIGA: a sensitive, precise and automatic de novo Viral Genome Annotator,”  
599 *bioRxiv*, p. 277509, Mar. 2018.
- 600 [26] E. Zankari *et al.*, “Identification of acquired antimicrobial resistance genes,” *J. Antimicrob. Chemother.*,  
601 vol. 67, no. 11, pp. 2640–4, Nov. 2012.
- 602 [27] K. A. Kleinheinz, K. G. Joensen, and M. V. Larsen, “Applying the ResFinder and VirulenceFinder web-  
603 services for easy identification of acquired antibiotic resistance and E. coli virulence genes in  
604 bacteriophage and prophage nucleotide sequences,” *Bacteriophage*, vol. 4, no. 1, p. e27943, Jan. 2014.
- 605 [28] K. G. Joensen *et al.*, “Real-Time Whole-Genome Sequencing for Routine Typing, Surveillance, and  
606 Outbreak Detection of Verotoxigenic *Escherichia coli*,” *J. Clin. Microbiol.*, vol. 52, no. 5, pp. 1501–1510,  
607 May 2014.
- 608 [29] E. Adriaenssens and J. R. Brister, “How to Name and Classify Your Phage: An Informal Guide,”  
609 *Viruses*, vol. 9, no. 4, 2017.
- 610 [30] J. Ågren, A. Sundström, T. Häfström, and B. Segerman, “Gegenees: Fragmented Alignment of Multiple  
611 Genomes for Determining Phylogenomic Distances and Genetic Signatures Unique for Specified  
612 Target Groups,” *PLoS One*, vol. 7, no. 6, p. e39107, Jun. 2012.
- 613 [31] S. Kumar, G. Stecher, and K. Tamura, “MEGA7: Molecular Evolutionary Genetics Analysis Version 7.0  
614 for Bigger Datasets,” *Mol. Biol. Evol.*, vol. 33, no. 7, pp. 1870–1874, Jul. 2016.
- 615 [32] A. Lopes, P. Tavares, M.-A. Petit, R. Guérois, and S. Zinn-Justin, “Automated classification of tailed  
616 bacteriophages according to their neck organization,” *BMC Genomics*, vol. 15, no. 1, p. 1027, Nov. 2014.

- 617 [33] D. J. Mercanti *et al.*, "Genomic Diversity of Phages Infecting Probiotic Strains of *Lactobacillus*  
618 *paracasei*," *Appl. Environ. Microbiol.*, vol. 82, no. 1, pp. 95–105, Jan. 2016.
- 619 [34] R. C. Edgar, "MUSCLE: multiple sequence alignment with high accuracy and high throughput,"  
620 *Nucleic Acids Res.*, vol. 32, no. 5, pp. 1792–7, 2004.
- 621 [35] K. Tamura and M. Nei, "Estimation of the number of nucleotide substitutions in the control region of  
622 mitochondrial DNA in humans and chimpanzees.," *Mol. Biol. Evol.*, vol. 10, no. 3, pp. 512–26, May  
623 1993.
- 624 [36] T. C. Hsieh, K. H. Ma, and A. Chao, "iNEXT: an R package for rarefaction and extrapolation of species  
625 diversity (Hill numbers)," *Methods Ecol. Evol.*, vol. 7, no. 12, pp. 1451–1456, Dec. 2016.
- 626 [37] A. Chao *et al.*, "Rarefaction and extrapolation with Hill numbers: A framework for sampling and  
627 estimation in species diversity studies," *Ecol. Monogr.*, vol. 84, no. 1, pp. 45–67, 2014.
- 628 [38] RStudio Team, "RStudio: Integrated Development for R." Boston, MA, 2016.
- 629 [39] N. S. Olsen, W. Kot, L. M. F. Junco, and L. H. Hansen, "Exploring the remarkable diversity of  
630 *Escherichia coli* Phages in the Danish Wastewater Environment, Including 91 Novel Phage Species,"  
631 *bioRxiv*, p. 2020.01.19.911818, Jan. 2020.
- 632 [40] E. M. Adriaenssens *et al.*, "Integration of genomic and proteomic analyses in the classification of the  
633 Siphoviridae family," *Virology*, vol. 477, pp. 144–154, Mar. 2015.
- 634 [41] C. d'Humières *et al.*, "A simple, reproducible and cost-effective procedure to analyse gut phageome:  
635 from phage isolation to bioinformatic approach," *Sci. Rep.*, vol. 9, no. 1, pp. 1–13, Dec. 2019.
- 636 [42] "DNA Sequencing Costs: Data | NHGRI." [Online]. Available: [https://www.genome.gov/about-](https://www.genome.gov/about-genomics/fact-sheets/DNA-Sequencing-Costs-Data)  
637 [genomics/fact-sheets/DNA-Sequencing-Costs-Data](https://www.genome.gov/about-genomics/fact-sheets/DNA-Sequencing-Costs-Data). [Accessed: 23-Feb-2020].
- 638 [43] H. Brussow, C. Canchaya, and W.-D. Hardt, "Phages and the Evolution of Bacterial Pathogens: from  
639 Genomic Rearrangements to Lysogenic Conversion," *Microbiol. Mol. Biol. Rev.*, vol. 68, no. 3, pp. 560–  
640 602, Sep. 2004.
- 641 [44] R. Reindel and C. R. Fiore, "Phage therapy: Considerations and challenges for development," *Clin.*  
642 *Infect. Dis.*, vol. 64, no. 11, pp. 1589–1590, 2017.
- 643 [45] W. Calero-Cáceres, M. Ye, and J. L. Balcázar, "Bacteriophages as Environmental Reservoirs of  
644 Antibiotic Resistance," *Trends in Microbiology*. 2019.

645



## Supplementary Figures and Tables for:

# A New High-throughput Screening (HiTS) Method for Phages – Enabling Crude Isolation and Fast Identification of Diverse Phages with Therapeutic Potential

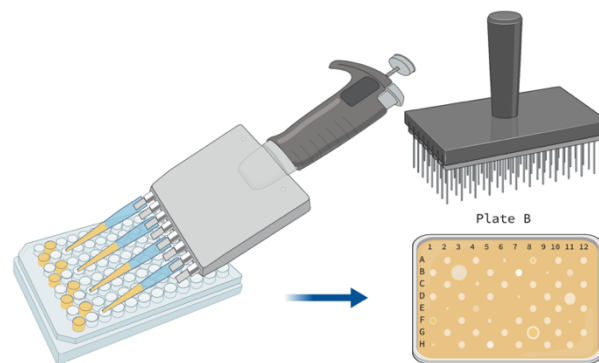

**Figure S1** Illustration of chequer plating, removing every second row of pipette-tips enables the easy transfer of lysate to every second well of a well-plate in a chequer pattern ensuring a safe distance between clearing zones when plating. Illustration created in BioRender.

**Table S1** List of samples used for phage screenings.

| Sample type | Company/source      | Facility/city | Samples            |
|-------------|---------------------|---------------|--------------------|
| Wastewater  | Billund             | Billund       | 1A, 1B             |
| Wastewater  | Billund             | Grindsted     | 2A, 2B             |
| Wastewater  | BIOFOS              | Avedøre       | 3A, 3B, 3C, 3D     |
| Wastewater  | BIOFOS              | Damhusåen     | 4A, 4B, 4C, 4D     |
| Wastewater  | BIOFOS              | Lynetten      | 5A, 5B, 5C, 5D     |
| Wastewater  | BlueKolding         | Kolding       | 6A, 6B, 6C, 6D     |
| Wastewater  | Din Forsyning       | Esbjerg vest  | 7A, 7B, 7C, 7D     |
| Wastewater  | Din Forsyning       | Esbjerg Øst   | 8A, 8B, 8C, 8D     |
| Wastewater  | Din Forsyning       | Ribe          | 9A, 9B, 9C, 9D     |
| Wastewater  | Din Forsyning       | Skovlund      | 10A, 10B, 10C, 10D |
| Wastewater  | Din Forsyning       | Varde         | 11A, 11B, 11C, 11D |
| Wastewater  | Favrskov Spildevand | Drøbro        | 12A, 12B, 12C, 12D |
| Wastewater  | Favrskov Spildevand | Hadsten       | 13A, 13B, 13C, 13D |
| Wastewater  | Favrskov Spildevand | Hammel        | 14A, 14B, 14C, 14D |
| Wastewater  | Favrskov Spildevand | Hinnerup      | 15A, 15B, 15C, 15D |
| Wastewater  | Favrskov Spildevand | Voldum        | 16A, 16B, 16C, 16D |
| Wastewater  | Hedensted           | Hedensted     | 17A, 17B, 17C, 17D |
| Wastewater  | Hedensted           | Juelsminde    | 18A, 18B, 18C, 18D |
| Wastewater  | Hedensted           | Tørring       | 19A, 19B, 19C, 19D |

|               |                                                |              |                    |
|---------------|------------------------------------------------|--------------|--------------------|
| Wastewater    | Helsingør Fors.                                | Helsingør    | 20A, 20B, 20C, 20D |
| Wastewater    | Herning Vand                                   | Herning      | 21A, 21B, 21C, 21D |
| Wastewater    | Hillerød service                               | Hillerød     | 22A, 22B, 22C, 22D |
| Wastewater    | Lemvig Fors.                                   | Lemvig       | 23A, 23B, 23C, 23D |
| Wastewater    | Provas Fors.                                   | Bevtoft      | 24A, 24B, 24C, 24D |
| Wastewater    | Provas Fors.                                   | Gram         | 25A, 25B, 25C, 25D |
| Wastewater    | Provas Fors.                                   | Haderslev    | 26A, 26B, 26C, 26D |
| Wastewater    | Provas Fors.                                   | Halk         | 27A, 27B, 27C, 27D |
| Wastewater    | Provas Fors.                                   | Jegerup      | 28A, 28B, 28C, 28D |
| Wastewater    | Provas Fors.                                   | Nustrup      | 29A, 29B, 29C, 29D |
| Wastewater    | Provas Fors.                                   | Over Jerstal | 30A, 30B, 30C, 30D |
| Wastewater    | Provas Fors.                                   | Skovby       | 31A, 31B, 31C, 31D |
| Wastewater    | Provas Fors.                                   | Skrydstrup   | 32A, 32B, 32C, 32D |
| Wastewater    | Provas Fors.                                   | Sommersted   | 33A, 33B, 33C, 33D |
| Wastewater    | Provas Fors.                                   | Vojens       | 34A, 34B, 34C, 34D |
| Wastewater    | Provas Fors.                                   | Årøsund      | 35A, 35B, 35C, 35D |
| Wastewater    | VandCenter Syd                                 | Ejby Mølle   | 36A, 36B, 36C, 36D |
| Wastewater    | VandCenter Syd                                 | Bogense      | 37A, 37B, 37C, 37D |
| Wastewater    | VandCenter Syd                                 | Hofmansgave  | 38A, 38B, 38C, 38D |
| Wastewater    | VandCenter Syd                                 | Hårslev      | 39A, 39B, 39C, 39D |
| Wastewater    | VandCenter Syd                                 | Nordvest     | 40A, 40B, 40C, 40D |
| Wastewater    | VandCenter Syd                                 | Nordøst      | 41A, 41B, 41C, 41D |
| Wastewater    | VandCenter Syd                                 | Otterup      | 42A, 42B, 42C, 42D |
| Wastewater    | VandCenter Syd                                 | Søndersø     | 43A, 43B, 43C, 43D |
| Wastewater    | Aalborg Kloak                                  | Vest         | 44A, 44B, 44C, 44D |
| Wastewater    | Aalborg Kloak                                  | Øst          | 45A, 45B, 45C, 45D |
| Wastewater    | Aarhus Vand                                    | Marselisborg | 46A, 46B, 46C, 46D |
| Wastewater    | Aarhus Vand                                    | Egå          | 47A, 47B, 47C, 47D |
| Wastewater    | Aarhus Vand                                    | Viby         | 48A, 48B, 48C, 48D |
| Soil          | Pondside                                       | Roskilde     | S1                 |
| Soil          | Next to rotten tree trunk                      | Roskilde     | S2                 |
| Soil          | Parking lot                                    | Roskilde     | S3                 |
| Soil          | Potted chives                                  | Roskilde     | S4                 |
| Soil          | Lawn                                           | Roskilde     | S5                 |
| Soil          | molehill                                       | Roskilde     | S6                 |
| Soil          | Potted plant ( <i>Pelargonium graveolens</i> ) | Roskilde     | S7                 |
| Soil          | Flowerbed                                      | Roskilde     | S8                 |
| Organic waste |                                                | Svinninge    | O1                 |
| Organic waste |                                                | Glostrup     | O2                 |
| Organic waste |                                                | Holbæk       | O3                 |
| Organic waste |                                                | Holsted      | O4                 |

**Table S2** List of unique *P. aeruginosa* phages i.e. those which differ by >5% from other phages in the dataset, identified in the LV screening of Danish wastewater, soil and organic waste.

| phage       | genome size<br>(bp) | GC<br>(%) | CDS<br>(n) | tRNAs<br>(n) | Novel <sup>1</sup> | taxonomy                                     | Sample                                                 | Accession |
|-------------|---------------------|-----------|------------|--------------|--------------------|----------------------------------------------|--------------------------------------------------------|-----------|
| clash       | 44912               | 52.1      | 68         | 3            | *                  | <i>Podoviridae</i> ;<br><i>Bruyoghevirus</i> | 1A, 2B, 9A                                             | MT119362  |
| otherone    | 44930               | 52.1      | 68         | 3            |                    | <i>Podoviridae</i> ;<br><i>Bruyoghevirus</i> | 1B                                                     | MT119373  |
| oldone      | 45313               | 52.5      | 69         | 4            | *                  | <i>Podoviridae</i> ;<br><i>Bruyoghevirus</i> | 4C                                                     | MT119371  |
| Iggy        | 60769               | 56.5      | 90         | -            |                    | <i>Siphoviridae</i> .                        | 4D                                                     | MN029011  |
| datas       | 60746               | 54.8      | 89         | -            |                    | <i>Myoviridae</i> ; <i>Pbunavirus</i>        | 21B                                                    | MT119378  |
| goonie      | 64599               | 55.6      | 94         | -            |                    | <i>Myoviridae</i> ; <i>Pbunavirus</i>        | 8C                                                     | MT133561  |
| elmo        | 65276               | 55.0      | 91         | -            |                    | <i>Myoviridae</i> ; <i>Pbunavirus</i>        | 4B                                                     | MT119364  |
| willy       | 65355               | 55.6      | 92         | -            |                    | <i>Myoviridae</i> ; <i>Pbunavirus</i>        | 20C                                                    | MT133562  |
| billy       | 65580               | 54.9      | 91         | -            |                    | <i>Myoviridae</i> ; <i>Pbunavirus</i>        | 6D                                                     | MT133563  |
| steven      | 65632               | 54.9      | 92         | -            |                    | <i>Myoviridae</i> ; <i>Pbunavirus</i>        | 11D                                                    | MT119370  |
| antinowhere | 65852               | 55.2      | 91         | -            | *                  | <i>Myoviridae</i> ; <i>Pbunavirus</i>        | 2B, 5D                                                 | MT119374  |
| misfit      | 65887               | 54.9      | 93         | -            |                    | <i>Myoviridae</i> ; <i>Pbunavirus</i>        | 3B                                                     | MT119367  |
| chumba      | 65852               | 55.0      | 92         | -            |                    | <i>Myoviridae</i> ; <i>Pbunavirus</i>        | 3D, 7D, 8D                                             | MT119375  |
| goodold     | 66226               | 55.6      | 95         | -            |                    | <i>Myoviridae</i> ; <i>Pbunavirus</i>        | 6A, 6B, 9A                                             | MT119365  |
| chunk       | 66231               | 55.6      | 93         | -            |                    | <i>Myoviridae</i> ; <i>Pbunavirus</i>        | 1B                                                     | MT119376  |
| debbie      | 66259               | 55.7      | 93         | -            |                    | <i>Myoviridae</i> ; <i>Pbunavirus</i>        | 7A, 8B, 10A, 12D,<br>15C, 18C, 18D,<br>21C, O1, O2, O3 | MT119363  |
| jett        | 66262               | 55.6      | 93         | -            | *                  | <i>Myoviridae</i> ; <i>Pbunavirus</i>        | 8A, 11A, 13D                                           | MT119366  |
| crassa      | 66295               | 55.2      | 91         | -            | *                  | <i>Myoviridae</i> ; <i>Pbunavirus</i>        | 4A                                                     | MT119377  |
| cory        | 66395               | 55.2      | 91         | -            | *                  | <i>Myoviridae</i> ; <i>Pbunavirus</i>        | 4C                                                     | MT119372  |
| sortsol     | 66445               | 55.7      | 91         | -            | *                  | <i>Myoviridae</i> ; <i>Pbunavirus</i>        | 4D, 13B, 19A                                           | MT119369  |
| shane       | 66467               | 55.6      | 95         | -            |                    | <i>Myoviridae</i> ; <i>Pbunavirus</i>        | 14D, 16B                                               | MT119368  |
| fnug        | 278899              | 36.9      | 360        | 6            | *                  | <i>Myoviridae</i> ; <i>Phikzvirus</i>        | 1B                                                     | MT133560  |

<sup>1</sup>Novel phage species classified by a 95% nucleotide similarity demarcation are indicated by an asterisk.

**Table S3** List of unique *Enterococcus* phages i.e. those which differ by >5% from other phages in the dataset, identified in the SV screening of Danish wastewater

| Phage          | genome size<br>(bp) | GC<br>(%) | CDS<br>(n) | tRNAs<br>(n) | Novel <sup>1</sup> | Taxonomy                                  | Sample | Accession |
|----------------|---------------------|-----------|------------|--------------|--------------------|-------------------------------------------|--------|-----------|
| heks           | 39708               | 35,0      | 64         | -            | *                  | <i>Siphoviridae</i> ; <i>Efqatrovirus</i> | 4A     | MT119359  |
| Nonaheksakonda | 41994               | 34.6      | 74         | -            | *                  | <i>Siphoviridae</i> ; <i>Efqatrovirus</i> | 45D    | MK125140  |
| vipetofem      | 85371               | 30.3      | 134        | 1            |                    | <i>Siphoviridae</i>                       | 44D    | MT119361  |
| nattely        | 85669               | 30.2      | 131        | 1            | *                  | <i>Siphoviridae</i>                       | 46D    | MT119360  |

<sup>1</sup>Novel phage species classified by a 95% nucleotide similarity demarcation are indicated by an asterisk.

**Table S4** List of unique *Salmonella* phages i.e. those which differ by >5% from other phages in the dataset, identified in the SV and LV screenings of Danish wastewater.

| phage         | genome size<br>(bp) | GC<br>(%) | CDS<br>(n) | tRNAs<br>(n) | Novel <sup>1</sup> | taxonomy                                                    | Sample                                                                                 | Accession |
|---------------|---------------------|-----------|------------|--------------|--------------------|-------------------------------------------------------------|----------------------------------------------------------------------------------------|-----------|
| astrid        | 11713               | 39.8      | 15         | -            | *                  | <i>Podoviridae; Picovirinae</i>                             | 7D                                                                                     | MK080312  |
| astrithr      | 11569               | 39.7      | 15         | -            | *                  | <i>Podoviridae; Picovirinae</i>                             | 7C                                                                                     | MT074429  |
| assan         | 11578               | 39.8      | 15         | -            | *                  | <i>Podoviridae; Picovirinae</i>                             | 10D                                                                                    | MT074440  |
| lumpael       | 41126               | 59.5      | 58         | -            | *                  | <i>Podoviridae</i>                                          | 3A, 15D,<br>44A, 46B,<br>48A                                                           | MK125141  |
| wast          | 40748               | 49.8      | 59         | 1            | *                  | <i>Siphoviridae;</i><br><i>Guernseyvirinae; Jerseyvirus</i> | 28C, 31B,<br>31C, 31D,<br>32C, 34B,<br>34D, 36A                                        | MT074451  |
| sidste        | 42124               | 50.0      | 56         | -            | *                  | <i>Siphoviridae;</i>                                        | 35B                                                                                    | MT074481  |
| templet       | 41597               | 49.9      | 58         | 1            | *                  | <i>Siphoviridae;</i><br><i>Guernseyvirinae; Jerseyvirus</i> | 6B, 7A,<br>10B, 10D,<br>36B                                                            | MT074462  |
| blauhaus      | 41993               | 49.7      | 61         | -            | *                  | <i>Siphoviridae;</i><br><i>Guernseyvirinae; Jerseyvirus</i> | 47B, 48B,<br>48C, 48D                                                                  | MT074473  |
| Horsemountain | 42375               | 49.8      | 58         | 1            | *                  | <i>Siphoviridae;</i><br><i>Guernseyvirinae; Jerseyvirus</i> | 21A, 21D,<br>22A, 22C,<br>45D                                                          | MT074482  |
| skrot         | 42879               | 49.7      | 65         | -            | *                  | <i>Siphoviridae;</i><br><i>Guernseyvirinae; Jerseyvirus</i> | 34C                                                                                    | MT074483  |
| dunkel        | 43985               | 49.7      | 64         | -            | *                  | <i>Siphoviridae;</i><br><i>Guernseyvirinae; Jerseyvirus</i> | 8D                                                                                     | MT074432  |
| demigod       | 43605               | 50.1      | 56         | 1            | *                  | <i>Siphoviridae;</i><br><i>Guernseyvirinae; Jerseyvirus</i> | 2A, 3A,<br>3C, 3D,<br>4A, 4C,<br>2 x 4D,<br>25D, 26B,<br>40A, 40D,<br>41A, 41D,<br>45C | MT074431  |
| celemicas     | 43193               | 49.8      | 66         | 1            | *                  | <i>Siphoviridae;</i><br><i>Guernseyvirinae; Jerseyvirus</i> | 2B                                                                                     | MT074484  |
| pink          | 43203               | 49.7      | 70         | -            | *                  | <i>Siphoviridae;</i><br><i>Guernseyvirinae; Jerseyvirus</i> | 6D, 7C,<br>7D, 19D,<br>20C, 21B                                                        | MT074430  |
| akira         | 45367               | 46.0      | 85         | 1            | *                  | <i>Siphoviridae; Roufvirus</i>                              | 21B                                                                                    | MK599416  |
| slyngel       | 51048               | 44.0      | 80         | -            | *                  | <i>Siphoviridae; Tunavirinae;</i><br><i>Hanrivervirus</i>   | 36A                                                                                    | MT074433  |
| emiel         | 52333               | 45.9      | 67         | -            | *                  | <i>Myoviridae</i>                                           | 6A, 24A                                                                                | MT074434  |
| brorfarstad   | 52392               | 45.7      | 72         | -            | *                  | <i>Myoviridae</i>                                           | 44D                                                                                    | MT074435  |
| yarpen        | 52464               | 46.0      | 69         | -            | *                  | <i>Myoviridae</i>                                           | 1A                                                                                     | MT074436  |
| rivia         | 52587               | 45.9      | 70         | -            | *                  | <i>Myoviridae</i>                                           | 6B, 47B,                                                                               | MT074438  |
| nenneke       | 52576               | 45.9      | 71         | -            | *                  | <i>Myoviridae</i>                                           | 44A, 46B                                                                               | MT074437  |
| birk          | 52767               | 45.8      | 73         | -            | *                  | <i>Myoviridae</i>                                           | 5C                                                                                     | MT074439  |
| brunost       | 52821               | 46.0      | 72         | -            | *                  | <i>Myoviridae</i>                                           | 5A, 10C,                                                                               | MT074441  |
| ciri          | 52916               | 45.9      | 71         | -            | *                  | <i>Myoviridae</i>                                           | 27A                                                                                    | MT074442  |
| zoltan        | 52933               | 45.9      | 71         | -            | *                  | <i>Myoviridae</i>                                           | 41D                                                                                    | MT074443  |

|                  |        |      |     |    |   |                                                            |                   |          |
|------------------|--------|------|-----|----|---|------------------------------------------------------------|-------------------|----------|
| emhyr            | 52948  | 45.9 | 71  | -  | * | <i>Myoviridae</i>                                          | 35C               | MT074444 |
| renfri           | 52952  | 45.9 | 71  | -  | * | <i>Myoviridae</i>                                          | 40B               | MT074445 |
| triss            | 53333  | 45.9 | 72  | -  | * | <i>Myoviridae</i>                                          | 39D               | MT074446 |
| bombadil         | 109539 | 40.0 | 163 | 28 | * | <i>Siphoviridae; Tequintavirus</i>                         | 38D               | MT074449 |
| oldekolle        | 109372 | 39.3 | 157 | 23 | * | <i>Siphoviridae; Tequintavirus</i>                         | 20A               | MT074448 |
| phagemcphageface | 105405 | 39.9 | 151 | 25 | * | <i>Siphoviridae; Tequintavirus</i>                         | 42D               | MT074447 |
| ende             | 111297 | 40.0 | 164 | 26 | * | <i>Siphoviridae; Tequintavirus</i>                         | 1B                | MT074454 |
| beppo            | 111322 | 40.1 | 167 | 27 | * | <i>Siphoviridae; Tequintavirus</i>                         | 46D, 48A          | MT074455 |
| rutana           | 114544 | 39.9 | 168 | 29 | * | <i>Siphoviridae; Tequintavirus</i>                         | 46B, 48A          | MT074468 |
| gmork            | 113259 | 39.9 | 166 | 29 | * | <i>Siphoviridae; Tequintavirus</i>                         | 43B, 47A          | MT074463 |
| vaffelhjerte     | 110831 | 40.0 | 160 | 28 |   | <i>Siphoviridae; Tequintavirus</i>                         | 6D, 24A,<br>47C   | MT074452 |
| polluks          | 111599 | 40.0 | 162 | 27 | * | <i>Siphoviridae; Tequintavirus</i>                         | 40D               | MT074456 |
| oselot           | 113503 | 39.9 | 171 | 28 | * | <i>Siphoviridae; Tequintavirus</i>                         | 46B               | MT074465 |
| faergetype       | 110183 | 40.0 | 161 | 25 |   | <i>Siphoviridae; Tequintavirus</i>                         | 42B               | MT074450 |
| bastian          | 112477 | 40.0 | 168 | 29 | * | <i>Siphoviridae; Tequintavirus</i>                         | 45A, 46A          | MT074459 |
| rokbiter         | 112006 | 39.9 | 163 | 29 | * | <i>Siphoviridae; Tequintavirus</i>                         | 39B               | MT074457 |
| fuchur           | 112117 | 40.0 | 166 | 31 | * | <i>Siphoviridae; Tequintavirus</i>                         | 39C, 39D          | MT074458 |
| bux              | 112486 | 40.0 | 160 | 29 | * | <i>Siphoviridae; Tequintavirus</i>                         | 46C               | MT074460 |
| falkor           | 114211 | 39.8 | 165 | 27 | * | <i>Siphoviridae; Tequintavirus</i>                         | 1A, 3A            | MT074467 |
| smaug            | 112590 | 39.8 | 161 | 24 | * | <i>Siphoviridae; Tequintavirus</i>                         | 42A               | MT074461 |
| atrejo           | 114059 | 40.0 | 167 | 29 | * | <i>Siphoviridae; Tequintavirus</i>                         | 44A               | MT074466 |
| misterkot        | 110937 | 39.8 | 159 | 28 | * | <i>Siphoviridae; Tequintavirus</i>                         | 40C               | MT074453 |
| bobsandoy        | 113461 | 39.9 | 165 | 29 | * | <i>Siphoviridae; Tequintavirus</i>                         | 4B                | MT074464 |
| pertopsoe        | 158905 | 45.3 | 202 | 3  | * | <i>Ackermannviridae;</i><br><i>Covirinae; Kutterovirus</i> | 8C, 25A,<br>25C   | MT074479 |
| dinky            | 157254 | 44.8 | 204 | 3  | * | <i>Ackermannviridae;</i><br><i>Covirinae; Kutterovirus</i> | 41A, 2 x<br>41D   | MT074475 |
| heyday           | 144232 | 44.5 | 187 | 3  | * | <i>Ackermannviridae;</i><br><i>Covirinae; Kutterovirus</i> | 7D, 8B,<br>25B    | MT074470 |
| bering           | 156130 | 44.7 | 203 | 4  | * | <i>Ackermannviridae;</i><br><i>Covirinae; Kutterovirus</i> | 23B               | MT074472 |
| barely           | 157920 | 44.6 | 197 | 3  | * | <i>Ackermannviridae;</i><br><i>Covirinae; Kutterovirus</i> | 7A                | MT074477 |
| rabagast         | 143249 | 44.5 | 188 | 3  |   | <i>Ackermannviridae;</i><br><i>Covirinae; Kutterovirus</i> | 5A, 5B            | MT074469 |
| kage             | 157658 | 44.5 | 205 | 3  |   | <i>Ackermannviridae;</i><br><i>Covirinae; Kutterovirus</i> | 36C, 36D          | MT074476 |
| allotria         | 151015 | 45.1 | 202 | 4  | * | <i>Ackermannviridae;</i><br><i>Covirinae; Kutterovirus</i> | 5C                | MT074471 |
| moki             | 158230 | 44.4 | 209 | 3  | * | <i>Ackermannviridae;</i><br><i>Covirinae; Kutterovirus</i> | 44B               | MT074478 |
| aagejoakim       | 156801 | 44.5 | 205 | -  | * | <i>Ackermannviridae;</i><br><i>Covirinae; Kutterovirus</i> | 43A, 43D,<br>40 B | MT074474 |
| maane            | 159128 | 45.2 | 204 | 4  | * | <i>Ackermannviridae;</i><br><i>Covirinae; Kutterovirus</i> | 6A                | MT074480 |

<sup>1</sup>Novel phage species classified by a 95% nucleotide similarity demarcation are indicated by an asterisk.

|               | 1   | 2   | 3   | 4   | 5   | 6   | 7   | 8   | 9   | 10  | 11  | 12  | 13  | 14  | 15  | 16  | 17  | 18  | 19  | 20  | 21  | 22  |
|---------------|-----|-----|-----|-----|-----|-----|-----|-----|-----|-----|-----|-----|-----|-----|-----|-----|-----|-----|-----|-----|-----|-----|
| 1 cory        | 100 | 75  | 69  | 79  | 81  | 83  | 81  | 81  | 77  | 58  | 57  | 58  | 59  | 58  | 58  | 55  | 53  | 0   | 0   | 0   | 0   | 0   |
| 2 antinowhere | 75  | 100 | 68  | 74  | 75  | 79  | 77  | 78  | 72  | 62  | 61  | 61  | 60  | 59  | 61  | 60  | 59  | 0   | 0   | 0   | 0   | 0   |
| 3 crassa      | 69  | 68  | 100 | 72  | 73  | 74  | 73  | 73  | 68  | 62  | 61  | 64  | 65  | 62  | 64  | 64  | 62  | 0   | 0   | 0   | 0   | 0   |
| 4 elmo        | 80  | 74  | 73  | 100 | 86  | 85  | 87  | 84  | 81  | 53  | 51  | 51  | 51  | 52  | 52  | 50  | 49  | 0   | 0   | 0   | 0   | 0   |
| 5 steven      | 83  | 76  | 73  | 86  | 100 | 86  | 85  | 86  | 80  | 50  | 50  | 49  | 50  | 49  | 51  | 49  | 46  | 0   | 0   | 0   | 0   | 0   |
| 6 chumba      | 83  | 80  | 75  | 84  | 85  | 100 | 89  | 88  | 83  | 50  | 49  | 48  | 49  | 47  | 49  | 47  | 44  | 0   | 0   | 0   | 0   | 0   |
| 7 misfit      | 82  | 76  | 74  | 86  | 85  | 89  | 100 | 92  | 82  | 49  | 48  | 46  | 47  | 46  | 49  | 47  | 45  | 0   | 0   | 0   | 0   | 0   |
| 8 billy       | 81  | 78  | 74  | 84  | 85  | 89  | 92  | 100 | 85  | 48  | 47  | 46  | 46  | 45  | 47  | 47  | 44  | 0   | 0   | 0   | 0   | 0   |
| 9 datas       | 84  | 79  | 74  | 88  | 87  | 90  | 89  | 92  | 100 | 48  | 48  | 49  | 48  | 48  | 49  | 47  | 44  | 0   | 0   | 0   | 0   | 0   |
| 10 jett       | 58  | 63  | 63  | 52  | 51  | 50  | 49  | 48  | 45  | 100 | 87  | 83  | 84  | 81  | 85  | 84  | 83  | 0   | 0   | 0   | 0   | 0   |
| 11 sortsol    | 57  | 61  | 61  | 50  | 49  | 48  | 47  | 46  | 44  | 87  | 100 | 83  | 83  | 80  | 83  | 83  | 83  | 0   | 0   | 0   | 0   | 0   |
| 12 willy      | 59  | 62  | 65  | 50  | 49  | 49  | 47  | 46  | 45  | 84  | 83  | 100 | 94  | 87  | 86  | 86  | 85  | 0   | 0   | 0   | 0   | 0   |
| 13 shane      | 59  | 61  | 66  | 50  | 50  | 48  | 47  | 46  | 43  | 83  | 83  | 93  | 100 | 88  | 87  | 87  | 86  | 0   | 0   | 0   | 0   | 0   |
| 14 goonie     | 59  | 60  | 63  | 52  | 49  | 48  | 47  | 46  | 45  | 82  | 82  | 88  | 90  | 100 | 85  | 84  | 83  | 0   | 0   | 0   | 0   | 0   |
| 15 goodold    | 58  | 61  | 65  | 51  | 50  | 50  | 50  | 47  | 45  | 85  | 84  | 85  | 87  | 84  | 100 | 88  | 87  | 0   | 0   | 0   | 0   | 0   |
| 16 debie      | 56  | 60  | 64  | 50  | 48  | 47  | 48  | 46  | 43  | 84  | 83  | 85  | 87  | 83  | 88  | 100 | 90  | 0   | 0   | 0   | 0   | 0   |
| 17 chunk      | 53  | 59  | 63  | 48  | 46  | 45  | 45  | 43  | 40  | 84  | 83  | 84  | 86  | 82  | 87  | 90  | 100 | 0   | 0   | 0   | 0   | 0   |
| 18 fnug       | 0   | 0   | 0   | 0   | 0   | 0   | 0   | 0   | 0   | 0   | 0   | 0   | 0   | 0   | 0   | 0   | 0   | 100 | 0   | 0   | 0   | 0   |
| 19 iggy       | 0   | 0   | 0   | 0   | 0   | 0   | 0   | 0   | 0   | 0   | 0   | 0   | 0   | 0   | 0   | 0   | 0   | 0   | 100 | 0   | 0   | 0   |
| 20 oldone     | 0   | 0   | 0   | 0   | 0   | 0   | 0   | 0   | 0   | 0   | 0   | 0   | 0   | 0   | 0   | 0   | 0   | 0   | 0   | 100 | 23  | 23  |
| 21 clash      | 0   | 0   | 0   | 0   | 0   | 0   | 0   | 0   | 0   | 0   | 0   | 0   | 0   | 0   | 0   | 0   | 0   | 0   | 0   | 24  | 100 | 100 |
| 22 otherone   | 0   | 0   | 0   | 0   | 0   | 0   | 0   | 0   | 0   | 0   | 0   | 0   | 0   | 0   | 0   | 0   | 0   | 0   | 0   | 23  | 100 | 100 |

**Figure S2** phylogenomic nucleotide distances of the 39 unique *P. aeruginosa* phages (Gegenees, BLASTn: fragment size: 200, step size: 100, threshold: 0).

|                  | 1   | 2   | 3   | 4   | 1   | 2   | 3   | 4   |
|------------------|-----|-----|-----|-----|-----|-----|-----|-----|
| 1 heks           | 100 | 85  | 0   | 0   | 100 | 90  | 16  | 16  |
| 2 Nonaheksakonda | 80  | 100 | 0   | 0   | 86  | 100 | 16  | 16  |
| 3 vipetofem      | 0   | 0   | 100 | 64  | 15  | 15  | 100 | 84  |
| 4 nattely        | 0   | 0   | 64  | 100 | 15  | 15  | 84  | 100 |

(a) (b)

**Figure S3** (a) Phylogenomic nucleotide distances of the 4 unique *Enterococcus* phages (Gegenees, BLASTn: fragment size: 200, step size: 100, threshold: 0%). (b) Phylogenomic amino acid distances of the 4 unique *Enterococcus* phages (Gegenees, BLASTx: fragment size: 200, step size: 100, threshold: 0%).

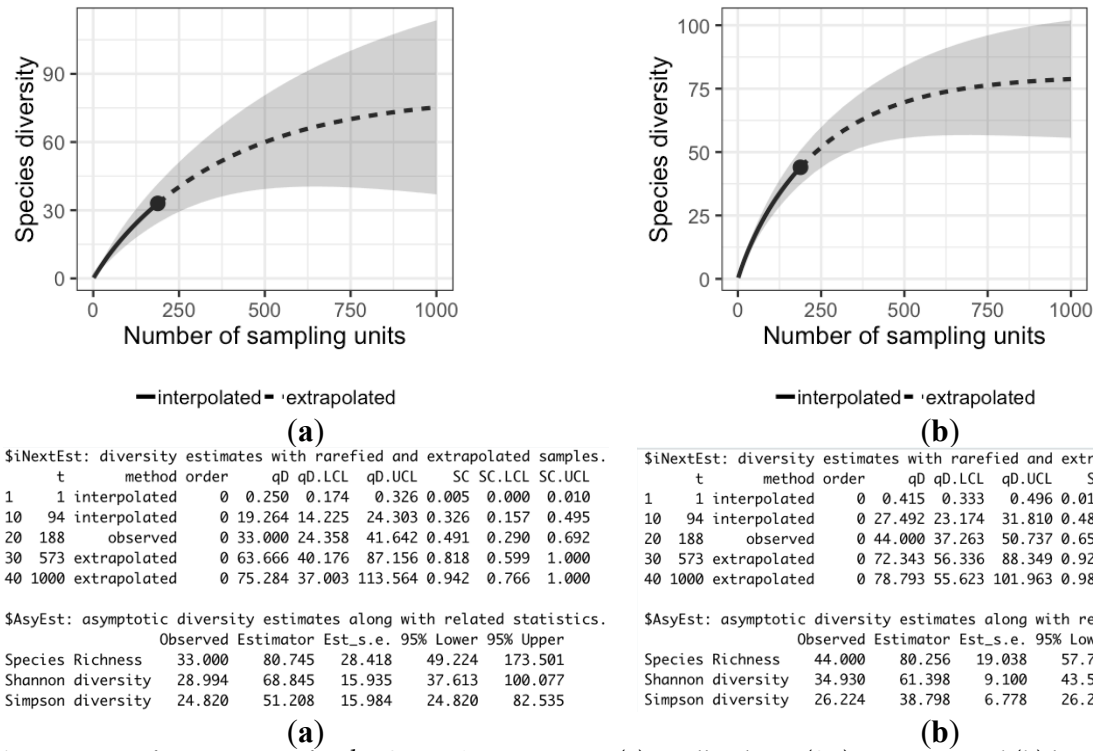

**Figure S4** Rarefaction curves for the *S. enterica* screenings; **(a)** small volume (SV) screening and **(b)** large volume (LV) screening. **(c)** Diversity indices for the small volume (0.5ml) screening based on identification of phages species in all 188 wastewater samples. **(d)** Diversity indices for the large volume (0.5ml) screening based on identification of phages species in all 188 wastewater samples.

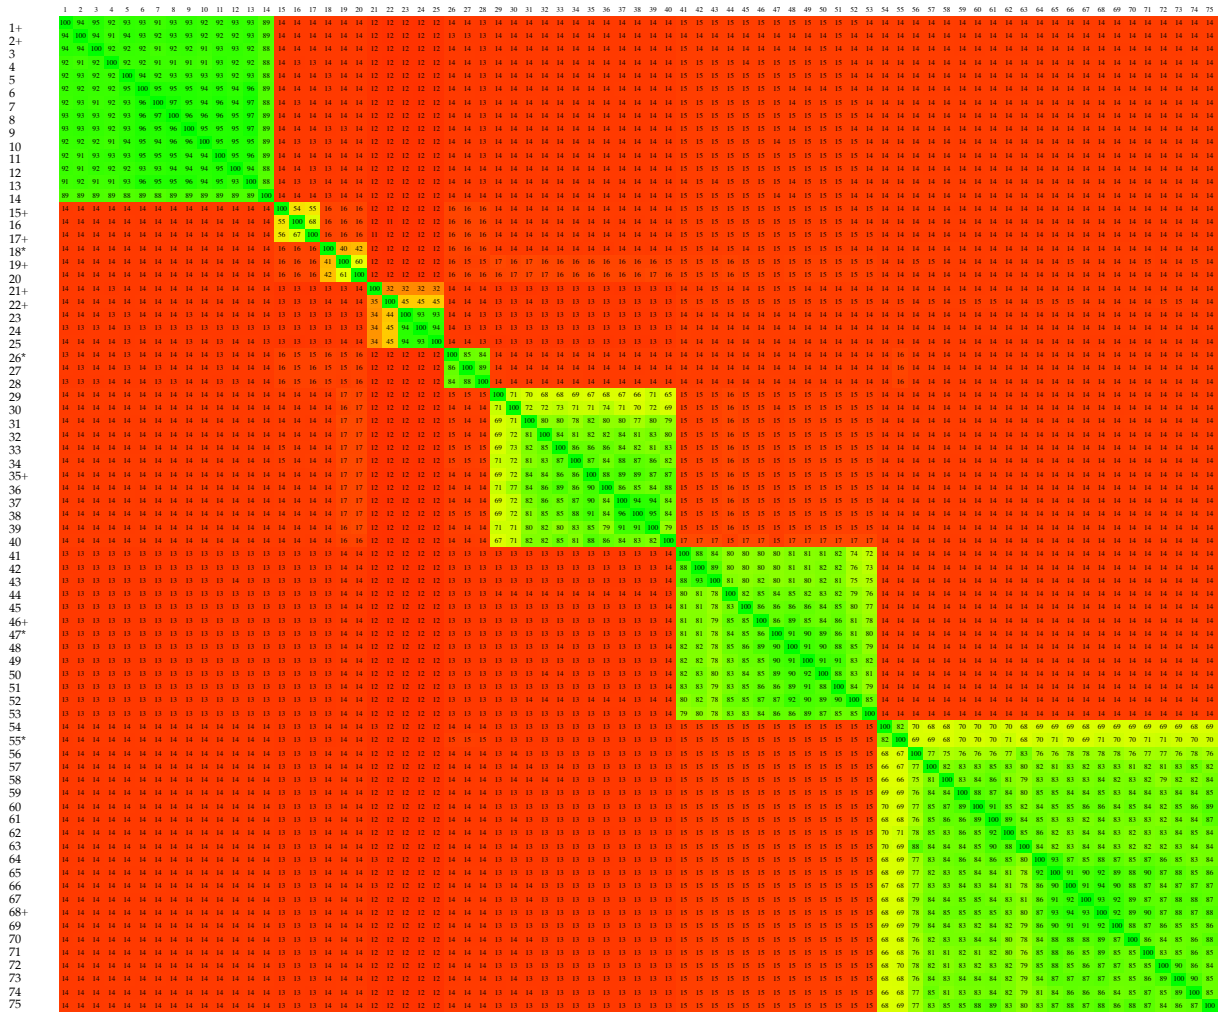

| #  | Phage                                      | #  | Phage                             | #  | Phage                    | #  | Phage                      |
|----|--------------------------------------------|----|-----------------------------------|----|--------------------------|----|----------------------------|
| 1  | + Salmonella phage BP63                    | 16 | Lumpael                           | 31 | dunkel                   | 46 | + Salmonella phage Sh19    |
| 2  | + Salmonella phage vB_SenM_PA13076 brunost | 17 | + Enterobacteria phage IME_EC2    | 32 | celemicas                | 47 | * Escherichia virus CBA120 |
| 3  |                                            | 18 | * Aeromonas phage pIS4-A          | 33 | skrot                    | 48 | moki                       |
| 4  | birk                                       | 19 | + Salmonella phage KFS_SE2        | 34 | horsemountain            | 49 | kage                       |
| 5  | ciri                                       | 20 | Akira                             | 35 | + Salmonella phage Ent11 | 50 | aagejoakim                 |
| 6  | zoltan                                     | 21 | + Podoviridae sp. ctcd61          | 36 | wast                     | 51 | dinky                      |
| 7  | emiel                                      | 22 | + Pectobacterium phage DU_PP_III  | 37 | sidste                   | 52 | heyday                     |
| 8  | yarpen                                     | 23 | astrid                            | 38 | templet                  | 53 | rabagast                   |
| 9  | nenneke                                    | 24 | assan                             | 39 | demigod                  | 54 | oldekolle                  |
| 10 | rivia                                      | 25 | astrithr                          | 40 | blauhaus                 | 55 | * Escherichia virus T5     |
| 11 | emhyr                                      | 26 | * Shigella phage pSf-1            | 41 | pertopsoe                | 56 | smaug                      |
| 12 | renfre                                     | 27 | slyngel                           | 42 | maane                    | 57 | bobsandoy                  |
| 13 | triss                                      | 28 | + Escherichia phage vB_EcoS_G29-2 | 43 | allotria                 | 58 | falkor                     |
| 14 | brorfarstad                                | 29 | * Salmonella phage Jersey         | 44 | barely                   | 59 | fuchur                     |
| 15 | + Escherichia phage Sortsne                | 30 | pink                              | 45 | bering                   | 60 | faergetype                 |
| 61 |                                            |    |                                   |    |                          | 61 | oselot                     |
| 62 |                                            |    |                                   |    |                          | 62 | bombadil                   |
| 63 |                                            |    |                                   |    |                          | 63 | phagemcphageface           |
| 64 |                                            |    |                                   |    |                          | 64 | misterkot                  |
| 65 |                                            |    |                                   |    |                          | 65 | rokbiter                   |
| 66 |                                            |    |                                   |    |                          | 66 | gmork                      |
| 67 |                                            |    |                                   |    |                          | 67 | vaffelhjerte               |
| 68 |                                            |    |                                   |    |                          | 68 | + Salmonella phage S147    |
| 69 |                                            |    |                                   |    |                          | 69 | polluaks                   |
| 70 |                                            |    |                                   |    |                          | 70 | bux                        |
| 71 |                                            |    |                                   |    |                          | 71 | rutana                     |
| 72 |                                            |    |                                   |    |                          | 72 | ende                       |
| 73 |                                            |    |                                   |    |                          | 73 | bastian                    |
| 74 |                                            |    |                                   |    |                          | 74 | atrejo                     |
| 75 |                                            |    |                                   |    |                          | 75 | beppo                      |

**Figure S5** Phylogenomic amino acid distances of the 59 unique *Salmonella* phages, selected closest relatives and type species of respective genera (Gegenees, BLASTx: fragment size: 200, step size: 100, threshold: 0%). Type species are denoted by an asterisk (\*), close relative by plus (+).
